1                   **Analyzing the efficacy of a decade-long endeavor:**  
2                   **extracurricular medical research training amidst the turmoil**  
3                   **of Syria**

4   Short title: Extracurricular medical research training amidst the Syrian war

5

6   **AUTHORS:**

7   Ibrahim Hanafi<sup>1\*</sup>, Marah Alsalkini<sup>2</sup>, Kheder Kheder<sup>3</sup>, Maarouf Gorra Al Nafouri<sup>4</sup>, Ahmad Rami  
8   Rahmeh<sup>5</sup>, Rami Sabouni<sup>4</sup>

9   1 Division of Neurology, Department of Internal Medicine, Faculty of Medicine, Damascus  
10   University, Damascus, Syria

11   2 Faculty of Medicine, Albaath University, Homs, Syria

12   3 Al-Andalus University for Medical Science, Tartus, Syria

13   4 Faculty of Medicine, Damascus University, Damascus, Syria

14   5 Department of Ophthalmology, Aleppo University Hospital, Aleppo, Syria

15   \* Correspondence: Ibrahim Hanafi, Division of Neurology, Department of Internal Medicine,  
16   Faculty of Medicine, Damascus University, Midan Area 9, Zahira Neighborhood 1, Muhiddin  
17   Kattab Ave, Lane 1021, Building 2, Damascus, Syria. Email: [Ibrahim.W.Hanafi@gmail.com](mailto:Ibrahim.W.Hanafi@gmail.com)

18

## 19 **ABSTRACT:**

20 Objectives: Medical research in Syria faced significant limitations due to inadequate human and  
21 financial resources, exacerbated by the ongoing war. Until recently, the curriculum did not  
22 incorporate sufficient training on research skills. Consequently, extracurricular workshops were  
23 initiated or utilized nationwide to acquire research-related expertise, aiming to bolster research  
24 output. This study aims to characterize and evaluate these training endeavors concerning  
25 research-related knowledge, attitudes, barriers, as well as research productivity.

26 Methods: This case-control study encompassed all training initiatives in Syria from 2011 to 2020,  
27 both on-site and online. Participants consisted of early career healthcare professionals affiliated  
28 with all Syrian universities and were recruited into four equal groups based on the quantity of  
29 research projects they undertook and published. Our participants reported and assessed  
30 individual extracurricular workshops regarding their gained knowledge, attitudes, and practical  
31 skills. These initiatives were compared to curricular training and practical peer-led support  
32 regarding these outcomes.

33 Results: The study included 53 on-site and 30 online workshops, displaying diverse distributions  
34 and features. Attendance of extracurricular workshops correlated with participants' knowledge,  
35 attitudes, and research productivity ( $p < 0.001$ ). The most effective interventions were massive  
36 open online courses and workshops lasting over 12 hours. Extracurricular workshops and peer-  
37 led support has comparable effectiveness and associated with higher knowledge, attitudes, and  
38 practical skills of their beneficiaries in comparison to curricular training (adjusted  $p < 0.05$ ). Lastly,  
39 peer trainers in these workshops exhibited more publications and higher levels of knowledge and  
40 attitude than the rest of the sample (adjusted  $p < 0.05$ ).

41 Conclusions: Overall, extracurricular interventions and peer support demonstrated their  
42 superiority over curricular training. Despite the varied nature of these workshops and the absence  
43 of institutional organization, these approaches exhibited significant potential in enhancing  
44 research-related knowledge, promoting positive attitudes, and augmenting research productivity  
45 in resource-constrained settings such as Syria.

46

## 47 **KEY WORDS:**

48 Extracurricular training; Evidence-based medicine; curriculum; research productivity; Syrian war.

49

## 50 **INTRODUCTION:**

51 Research in Syria faced many challenges before the war, including limited research capacities  
52 and financial support, which led to poor quantity and quality of research output (1,2). The situation  
53 was exaggerated during the Syrian armed conflict, which severely devastated the medical and  
54 educational infrastructure and forced the majority of the medical personnel to flee the country  
55 (3,4). Consequently, the remaining physicians had to deal with a flood of cases related and  
56 unrelated to war (5). leaving them too little motivation and time to improve their academic skills  
57 and conduct scientific research (6). In addition, the war also impacted the psychological wellbeing  
58 of healthcare professionals and workplace violence exacerbated the incidence of burn-out  
59 syndrome among them, which put them under constant pressure and depleted their mental health,  
60 competence, productivity, and work satisfaction (7,8). Moreover, the lack of research  
61 opportunities, as well as the poor training and mentoring became more prominent as the country

62 was left with a scarcity of expertise in this field (9,10). It is worth mentioning that evidence-based  
63 medicine (EBM) was not formally part of the curriculum in Syrian medical faculties until 2016  
64 (9,11). Hence, the pressing and yet unaddressed requirement remained the implementation of  
65 accessible, cost-effective, and sustainable training methodologies aimed at augmenting research-  
66 related competencies among Syrian medical professionals (12).

67 On the other hand, significant efforts started to target this paucity at the different Syrian medical  
68 schools and they were mainly led by small teams of residents and medical students (9). Local  
69 peer-led workshops arose as an alternative cheap method to assist medical students and  
70 residents in this field (13). Initially, these teams leveraged online international resources to  
71 enhance their research-related knowledge and skills. This initiative empowered them to  
72 autonomously strategize, execute, and publish research studies. Subsequently, they effectively  
73 orchestrated workshops across Syria, imparting fundamental principles of medical research to  
74 their peers, thereby sharing the expertise and experiences acquired. On the institutional level,  
75 these efforts were aided by associations gathering Syrian medical professionals practicing abroad  
76 such as the Syrian American Medical Society, who also coordinated advanced online courses  
77 regarding EBM and academic writing (14,15). Recently, more basic online workshops were  
78 delivered by peers performing research careers abroad (13,16). These online workshops were  
79 shown to be as effective as face-to-face workshops on participants' knowledge (14), but offered  
80 valuable advantages like affordability, flexible accessibility (13), and safety especially in war  
81 zones,(15) non-governmental controlled areas (17), and during pandemics (18,19), which made  
82 them more favorable in countries with limited resources like Syria. The progress made by Syrian  
83 efforts on this front paved the way for Syrian doctors to seek further training from international  
84 bodies when provided as massive open online courses (MOOCs) (9,16). For instance, remote-  
85 sites were liaised for the comprehensive course “the Introduction to the Principles and Practice of  
86 Clinical Research (IPPCR)” provided by the American national institutes of health (NIH) in several  
87 Syrian medical faculties and in several years. These steps made it possible to leverage from more

88 formal sources of medical research training even for participants in massively destroyed cities like  
89 Aleppo (20).  
90 Despite the great efforts spent to achieve all these extracurricular interventions and, when  
91 assessed, their proven effectiveness, it is difficult to tell whether they collectively achieved the  
92 goals they were aimed at nation-wide. These efforts were not tailored based on comprehensive  
93 assessments of the needs and barriers at each phase, location, and field (16). Additionally, they  
94 were mostly run by individual or team efforts and lacked cohesive organization and coordination,  
95 which hindered both the learning and teaching processes in the long run and challenged any  
96 comparison of the efficacy of the different efforts. Consequently, it is still to be proved that the  
97 Syrian medical research synthesis significantly improved in quality and quantity due to these  
98 initiatives, as most of the research articles published from Syria are still mostly case reports and  
99 cross-sectional studies and when they do not end up unpublished, they mostly get published in  
100 low impact journals. Therefore, this study aimed to characterize all extracurricular training  
101 opportunities utilized by early career Syrian healthcare workers during the first decade of the  
102 Syrian war and to assess their impact on attendees' knowledge, attitudes, perceived barriers, as  
103 well as their research productivity.

## 104 **METHODS:**

### 105 **The identification of extracurricular events targeting medical research:**

106 We identified all interventions targeting research capacity building for Syrian healthcare  
107 professionals during the period 2011-2020. This was performed through interviews with trainers  
108 and trainees from different academic levels and at all Syrian medical schools. We additionally  
109 performed a comprehensive search for event invitations on social media platforms, particularly in  
110 groups and channels that target Syrian healthcare professionals and medical and paramedical

111 students around the country. The final list of workshops included all extracurricular in-house  
112 training that took place at any of the Syrian medical schools as well as those offered online by  
113 international associations or platforms like the American National Institute of Health (NIH) and  
114 Coursera. We then extended our interviews to retrospectively define the features of each  
115 workshop including its city, year, trainers (professionals or peers), length (approximate number of  
116 training hours), size (approximate number of attendees), and focus (research methodology,  
117 critical appraisal, academic writing, statistical analysis, systematic reviews, and case reports).  
118 Online workshops were also classified into international workshops (i.e., offered by the NIH,  
119 Cochrane, Coursera, and Stanford school of Medicine) and Syrian workshops (i.e., offered by the  
120 Syrian American Medical Society and Syrian peers abroad). All of the international workshops  
121 were delivered in English, while most of the Syrian workshops were presented in Arabic. During  
122 data collection, participants also had the possibility to add missing workshops and provide details  
123 about their features (e.g., year, city, and duration).

#### 124 **Study design and population:**

125 This study had a case-control design, and its sample population is identical to the one reported  
126 in our previous article (21). The recruitment for data collection took place between 05.01.2021  
127 and 06.07.2021. Briefly, we communicated the questionnaire individually to all undergraduate  
128 students, postgraduate students, residents, and fresh specialists in all Syrian medical and  
129 paramedical faculties, who have at least one published article in a peer-reviewed journal. These  
130 participants were grouped into two equal arms, the first with one publication and the second with  
131 two or more publications. We then recruited two equal control groups, one with participants who  
132 contributed to at least one research study (without any publication) and the second with  
133 participants who had no previous research contributions. We maintained equal arms at every  
134 university and academic level (under- and postgraduates). Syrian specialists and postgraduate  
135 students who are currently practicing outside Syria but received their medical training in one of

136 the Syrian universities were not excluded. Participants in their first or second year of  
137 undergraduate studies or after more than one year from the end of their specialization were  
138 excluded. Further details regarding the ethical approval, data collection, and sample  
139 characteristics can be found in our previous article (21); which also reported participants' self-  
140 reported research-related knowledge, attitudes, and perceived barriers. Briefly, the ethical  
141 approval for this study (30/2020) was obtained from the institutional review board of Damascus  
142 University on 19.01.2021. All participants provided their written informed consent for the  
143 publication of their anonymous data before their participation.

144

#### 145 **The data collection tool:**

146 The questionnaire developed first asked the participants to identify all the workshops and trainings  
147 they took part in by selecting them from a list that contained the name, year, and city of each  
148 workshop. In the next step, participants had the possibility to refer to their first, second, and third  
149 best workshops in terms of knowledge and skills gained from it. For each of these one to three  
150 workshops, participants also assessed the gained knowledge, attitudes, and practical practice on  
151 a scale from one to ten, where one stood for poor benefit and ten stood for outstanding benefit.  
152 In order to compare these evaluations to other methods of gaining research-related knowledge  
153 and skills, we asked the participants to perform the same evaluation for undergraduate and  
154 postgraduate curricular research training as well as the practical support they received from peers  
155 they worked with on specific research projects. As most of the in-house training was peer-led, we  
156 supplemented the questionnaire with a section asking the participants to identify the workshops  
157 they participated in training. This information was used afterwards to compare the cohort of these  
158 peer trainers to the rest of the sample in terms including knowledge, attitudes, and publications.

#### 159 **Data analysis:**

160 The data was exported to Microsoft Excel 365 version 2011 (year 2020) then analyzed using the  
161 Statistical Package for the Social Sciences version 23.0 (SPSS Inc., Chicago, IL, United States).  
162 Details about the presentation and statistical analysis of the demographic characteristics,  
163 knowledge, attitudes, and barriers including association and correlation tests can be found in the  
164 first article (21). In addition, we used different logistic regression tests for models that predicted  
165 conducting and publishing research studies as well as number of extracurricular workshops  
166 attended and research knowledge and attitudes. For these analyses, regression coefficients and  
167 their 95% confidence intervals (CI) were reported as measures of association together with their  
168 P values.

169 As most of the participants with multiple publications attended several workshops with various  
170 features, we could not link higher research productivity (i.e., number of conducted and published  
171 research projects) to specific workshops characteristics. However, to sidestep this obstacle, we  
172 grouped participants repeatedly based on the dominant features in the workshops they attended.  
173 These groups of participants were then compared to draw conclusions about features responsible  
174 more for higher research conduction. For instance, if more than half of the workshops attended  
175 by a participant were delivered by peers, he was included in the group of peer-led training and  
176 otherwise he would be in the professional-led training group. The same applied when more than  
177 half of the training attended by the participant happened online, originated from international  
178 organizations, focused on research methodology, took place after 2017, had more than 12 training  
179 hours, and recruited more than 40 participants.

180 To limit the number of workshops presented, we excluded those that were attended by less than  
181 four participants from our population. To mitigate the possibility of over- or underestimating the  
182 rank or the self-assessed benefit from any workshop, we also excluded all workshops that  
183 received less than three evaluations (by three participants). For the rest, we allocated points  
184 based on the ranking the participants gave to each workshop, where workshops ranked first,



185 second, and third best got three, two, and one points, respectively. To adjust the rankings for the  
186 number of attendees, we divided the sum of the points of each workshop by the number of  
187 participants in our sample who reported attending this workshop. On the other hand, the gained  
188 knowledge, attitudes, and practical practice for each workshop were averaged among entries.

189 An Alpha value of 0.05 was used as a cutoff to determine statistical significance after Bonferroni  
190 correction for multiple comparisons. Figures were created using Microsoft Excel 365 version 2011  
191 (year 2020) and the Statistical Package for the Social Sciences version 23.0 (SPSS Inc., Chicago,  
192 IL, United States), while illustrations were designed using Adobe Illustrator (year 2017) and  
193 Microsoft PowerPoint 365 version 2011 (year 2020).

#### 194 **Patient and Public Involvement:**

195 The target audience for this project encompasses medical under- and postgraduates, and this  
196 report presents their assessment of the needs and challenges faced towards better research  
197 productivity. It is important to note that this project was solely executed by a team comprising  
198 these individuals, ensuring that the research directly addresses their needs and interests.

## 199 **RESULTS:**

#### 200 **The demographics of extracurricular medical research workshops:**

201 Fifty-six in-house workshops that targeted research-related skills were identified during the study  
202 period. Our workshops' list additionally included 53 online workshops that were accessible to  
203 Syrian healthcare personnel to learn about medical research. Of which, three in-house and 23  
204 online workshops were attended by less than four of our participants and were, therefore,  
205 excluded from the sample. The few in-house workshops that took place before 2017 were  
206 concentrated in Damascus. Afterwards, workshops increased in number and extended to the

207 other two major Syrian medical schools (i.e., Aleppo, and Latakia). In general, the workshops  
208 varied in the length of training, number of trainees, and covered topics. However, it can be noted  
209 that the most common trained topic of in-house workshops was research methodology (26; 49%),  
210 and these workshops had larger size than the ones focusing on other research skills. It is also  
211 worth mentioning that the topics covered were not homogenously distributed across the years  
212 (e.g., most systematic review workshops happened between 2016 and 2017). Additionally, the  
213 majority of in-house workshops (n=45; 85%) were conducted by peers, leaving only seven  
214 professional-led workshops, which focused mainly on research methodology. On the other hand,  
215 the majority of online workshops were delivered by professionals as MOOCs (n=22; 71%), and  
216 they mostly had more than 12 training hours. However, we could still isolate a group of online  
217 workshops delivered by Syrians, which were classified into professional-led trainings conducted  
218 by the SAMS and peer-led ones (Fig 1).

219

220 Fig 1: Inhouse and online training sources on medical research.

221 Fig 1 legend: Panel a illustrated inhouse trainings while panel b illustrates online sources of  
222 training.

223

224 The vast majority of these extracurricular workshops were offered for free and to all under- and  
225 postgraduate students as well as specialists. Nevertheless, we found that participants affiliated  
226 with the University of Aleppo attended more workshops compared to participants in Damascus  
227 and Latakia ( $P<0.001$ ). Furthermore, participants who had better internet connectivity or higher  
228 English competence also attended more workshops (S. table 1).

229 **The effectiveness of extracurricular medical research workshops:**

230 After excluding the participants who never attended any research focused extracurricular  
231 workshop, we found a significant moderate positive correlation between the number of  
232 extracurricular trainings attended and the number of research projects conducted. The number of  
233 attended trainings also correlated with the number of publications as well as the total scores of  
234 knowledge and attitudes (Fig 2). Moreover, we entered the number of trainings attended together  
235 with the total scores of knowledge, attitudes, and barriers, as well as the academic score in a  
236 stepwise multiple regression model to predict the number of research projects conducted or  
237 published for each participant. This analysis showed that the total knowledge score could  
238 independently predict research conduction and publication similarly to our previous article.(21)  
239 However, the number of attended extracurricular workshops had an independent added change  
240 of 3.6 % to the R2 ( $P < 0.001$ ) specifically in the prediction of number of conducted research studies  
241 (S. table 2).

242

243 Fig 2: The impact of the number of workshops attended on research productivity as well as the  
244 self-reported knowledge and attitudes towards medical research.

245 Fig 2 Legend: Panel a represents the correlations of conduction (blue) and publication (orange)  
246 of research studies, while panel b represents the same for the total knowledge (green) and  
247 attitudes (grey) scores. The correlations were estimated based on Spearman's rho methods.  
248 Participants who never attended any workshop were excluded ( $n=452$  for participation and panel  
249 b;  $n=364$  for publication).

250

251 **Comparing the features of medical research extracurricular workshops:**

252 MOOCs and workshops that had more than 12 training hours were associated with a higher  
253 number of conducted and published studies as well as higher knowledge scores than Syrian-led  
254 trainings and shorter workshops, respectively (Fig 3 and Fig 4). These findings were confirmed  
255 by stronger correlations between the number of workshops attended with these features on the  
256 first side and research productivity, knowledge, and attitudes on the other side (S. table 3).  
257 However, as these two features significantly coexist (i.e., most MOOCs had more than 12 training  
258 hours), we ran an ordinal logistic regression that confirmed the independent contributions of these  
259 two features to the higher research productivity (S. table 4). Furthermore, to isolate the added  
260 value of these two features, we added the total knowledge score (i.e., the best predictor of  
261 publications) to the same logistic regression. Interestingly, MOOCs lost their independence in  
262 predicting the number of publications while the length of the workshops retained its independent  
263 effect (S. table 5). On the other hand, participants who attended more professional-led trainings  
264 also conducted more research projects and had higher knowledge than those who attended more  
265 peer-led trainings. This difference was evident on the correlation analysis but did not show  
266 independent contributions to the predictions in the regression analyses.

267

268 Fig 3: The impact of workshops features on research conduction and publication.

269 Fig 3 legend: The bars refer to statistically significant differences in Mann-Whitney U test after  
270 Bonferroni correction for multiple comparisons ( $P=0.05/8=0.006$ ); the boxes depict interquartile  
271 ranges; the horizontal lines in the boxes present the medians; the X signs show the means; the  
272 extending vertical lines illustrate the ranges; and the dots that exceed the line represent outliers.

273

274 Fig 4: The impact of workshops features on participants' knowledge, and attitudes towards  
275 research.

276 Fig 4 Legend: The bars refer to statistically significant differences in Mann-Whitney U test after  
277 Bonferroni correction for multiple comparisons ( $P=0.05/8=0.006$ ); the boxes depict interquartile  
278 ranges; the horizontal lines in the boxes present the medians; the X signs show the means; the  
279 extending vertical lines illustrate the ranges; and the dots that exceed the line represent outliers.

280

281 **Participants' evaluation of extracurricular medical research workshops, curricular**  
282 **training, and peer support:**

283 Three-hundred-fifty-six participants of our sample indicated the best one to three extracurricular  
284 trainings they attended then self-evaluated their gained knowledge, attitudes, and practical skills  
285 from each one of them. After excluding the workshops that received less than three individual  
286 evaluations, only 54 workshops remained for the analysis. These assessments showed that  
287 averaged evaluations of the one to three best extracurricular workshops refer to higher gained  
288 knowledge, attitudes, and practical practice than the average of under- and postgraduate official  
289 curricular training. It also showed that practical peer support was rated as high as the  
290 extracurricular workshops and was also significantly higher than curricular training on the three  
291 scales (S. Fig 1). We then ran a correlation analysis between the self-evaluated gained knowledge  
292 and attitudes from each of the three training sources with the total knowledge and attitudes scores.  
293 The correlations confirmed our findings as they were significant for extra-curricular workshops  
294 and peer support but not for the curricular training. Additionally, the estimation of the gained  
295 knowledge, attitudes, and practical practice from peer support correlated significantly with  
296 research productivity, which did not apply to evaluations regarding curricular training. Meanwhile,

297 the same correlations regarding extracurricular workshops did not survive correction for multiple  
298 comparisons (S. table 6).

299 To compare the evaluations of gained knowledge, attitudes, and practical practice among the  
300 different features of the workshops, we averaged the assessments of each workshop across  
301 participants. Then, we compared the groups of workshops for each gained outcome. However,  
302 the only difference that survived the correction for multiple comparisons was the higher practical  
303 skills gained from MOOCs when compared to other online workshops (S. Fig 2).

#### 304 **Training on extracurricular medical research workshops:**

305 Seventy-five participants in our sample trained in at least one of the studied peer-led workshops;  
306 most of them (n=62, 82.7%) trained in less than three workshops, and 49 of them (65.3%) were  
307 affiliated with the University of Aleppo (S. table 7). Participants who trained in workshops reported  
308 higher numbers of research projects conducted and published as well as greater knowledge and  
309 attitudes compared to those who did not train on any workshop regardless of whether they  
310 attended or did not attend any workshop. Trainers also showed higher English competence and  
311 attended more workshops compared to those who did not participate in training any workshop  
312 (Fig 5). Among these five variables (i.e., research conduction, publication, knowledge, attitudes,  
313 and English level), the number of research projects conducted, and knowledge and attitudes  
314 scores were isolated as significant independent predictors of the variability between those who  
315 trained and did not train on workshops in a binary logistic regression analysis (S. table 8).

316

317 Fig 5: Comparison of the demographic characteristics and research contributions between peer  
318 trainers and attendees of research related trainings as well as those who never attended any of  
319 these trainings.

320 Fig 5 Legend: The bars represent statistically significant differences in the post-hoc Dunn-  
321 Bonferroni-Test pairwise comparison (adjusted  $P < 0.05$ ); the boxes depict interquartile ranges; the  
322 horizontal lines in the boxes present the medians; the X signs show the means; the extending  
323 vertical lines illustrate the ranges; and the dots that exceed the line represent outliers.

324

## 325 **DISCUSSION:**

326 Despite the unprecedented humanitarian crisis in Syria, Syrian students sought to develop their  
327 research skills by attending numerous in-house and online workshops conducted through Syrian  
328 efforts or provided by international organizations. This study was novel in providing a broad  
329 overview of the characteristics and effectiveness of all these interventions used during the first  
330 ten years of the Syrian armed conflict. We first proved that attending more of these workshops  
331 was associated with higher research knowledge, attitudes, and productivity. Then, we showed  
332 that self-reported research knowledge had particularly the strongest correlation with the number  
333 of attended workshops and was also the strongest predictor of the number of conducted and  
334 published research projects. Additionally, we could, using participants' evaluations, show that  
335 these extracurricular interventions were more effective than curricular training and as valuable as  
336 practical peer support during ongoing research projects. Finally, we presented a scheme  
337 summarizing all the modifiable personal factors that play a role in improving or hindering research  
338 productivity in our limited resources settings (Fig 6).

339

340 Fig 6: A scheme depicting all the investigated factors that affect research productivity among early  
341 career health professionals as well as the interrelations among them.

342 Fig 6 Legend: The blue arrows represent significant positive correlations; the orange arrows  
343 illustrate significant independent predictors with the dependent variable ahead of the arrow; and  
344 the green arrows depict significant association with higher effectiveness or recruitment of the  
345 extracurricular trainings.

346

347 Even in countries where research training is deeply rooted as a part of the curriculum, research  
348 workshops seemed to be the most effective way of training (22). These workshops are also widely  
349 recognized as an effective tool for promoting medical research in low- and middle-income  
350 countries (LMICs) (23–25). In Syrian, they were suggested as an attainable alternative to address  
351 the shortcomings of the research curriculum (10,16). Previous reports assessing individual  
352 interventions that targeted research skills including EBM and academic writing in Syria highlighted  
353 the knowledge-enhancing effects of their workshops (11,13,14,26), or at least improvement  
354 limited to attendees' confidence (27), or perceived skills (15). Additionally, a recent cross-  
355 sectional study on Syrian residents suggested that attending more trainings on medical research  
356 correlates with better practices of EBM (28). We similarly proved that attending more research  
357 workshops has a significant positive impact on research-related knowledge. Although this finding  
358 comes in line with previous reports, it uniquely generalizes their findings employing a novel  
359 comprehensive assessment that pooled all eligible interventions in the study period and recruited  
360 a large sample size from several universities and academic levels.

361 Our findings also confirmed that participants who attended more workshops reported higher  
362 attitudes towards research, which was described as a major outcome of one workshop targeting  
363 EBM.(26) Notably, attitudes towards research were less strongly correlated with workshops  
364 attendance compared to knowledge. We can attribute that to the fact that medical personnel in  
365 Syria, even those who have never conducted any research project, generally reported high



366 attitudes towards research (10,16), and this does not apply to the poor research-related  
367 knowledge repetitively reported (21,28,29). The weak impact of workshops on attitudes can also  
368 be due to the limited effectiveness of workshops in addressing certain research barriers, such as  
369 language, internet connection, and time availability (10,11,16,29), thus, hindering attitudes  
370 strengthening towards medical research.

371 Despite that, when it comes to studying the improvement in research productivity, trainings on  
372 research skills can achieve it in several pathways (Fig 6). Our previous article established that  
373 self-reported knowledge explains much of the variability in the number of conducted and  
374 published scientific papers (21). The current study also proves that attending research-related  
375 workshops as an independent factor has a positive additional value on research conduction. This  
376 can be attributed to the development of leadership and time management skills through  
377 extracurricular activities (30) and the possibility to engage more effectively in the research  
378 community during such trainings (31). The extracurricular workshops in Syria were also  
379 suggested to help in establishing research networks that foster research knowledge and  
380 participation, in addition to enhancing students' understanding of research materials (10,20). The  
381 higher research productivity we found among participants who attended longer workshops  
382 supports this logic, as the time by itself may offer a higher probability to the establishment of the  
383 aforementioned research networks. Although, the literature suggests that shorter courses can be  
384 of higher feasibility and effectiveness (12,32), they might not offer further mentorship after the  
385 training (33), possibly suggesting a lower impact on research productivity, which meets our  
386 findings.

387 Although MOOCs and traditional learning showed similar effectiveness in medical education by  
388 means of a meta-analysis (34), MOOCs remain a valuable, and sometimes the only, asset in  
389 LMICs to acquire the needed knowledge and skills to conduct research projects (35). In line with  
390 that, our study found that participants who attended MOOCs reported higher knowledge and

391 research productivity than those who attended other workshops. This can be explained by the  
392 findings of Li et al, which highlighted that MOOCs attendees tend to have higher motivation to  
393 learn (36). The open-structure of MOOCs also allows students to design their individual learning  
394 objectives depending on their needs (37). Therefore, we can speculate that participants who had  
395 running projects preferably attended MOOCs to address the specific knowledge gaps they faced  
396 during the progress of their projects, which could be the reason behind the higher knowledge and  
397 research conduction we found among MOOCs attendees. A similar pattern was evident in an  
398 academic writing workshop, where participants who practiced research skills through writing  
399 assignments gained higher objective knowledge than those who did not achieve these  
400 assignments (13).

401 Although the investigated workshops were in general effective in improving research knowledge,  
402 attitudes, and productivity, it is difficult to believe that Syrian healthcare personnel leveraged from  
403 the full capacities of these interventions. It was quite evident that these interventions lacked a  
404 consistent pattern across the different cities and varied in terms of content, delivery, and targeted  
405 group(s). This lack of organization can be attributed to the fact that they were in most cases driven  
406 by the needs in their proximity, which suggests a significant room for improvement if they become  
407 tailored based on up-to-date representative assessments of the needs and barriers towards  
408 research (10,13,16,21). On the other hand, we assume that the lack of institutional collaborations  
409 constrained the amplitude of benefit, especially from in-house workshops, to specific groups and  
410 locations. Therefore, it is important to emphasize the role of the concerned faculties and ministries  
411 in organizing research training efforts. This is particularly relevant in developing countries, where  
412 personnel with decision-making capacities are less involved in the scientific progress (38).

413 Nevertheless, this study emphasized the role of peers in pushing the wheel of research training  
414 in Syria (9). The vast majority of in-house trainings, as well as some online workshops, in our  
415 analysis relied heavily or completely on under- or postgraduate peer trainers with wider research

416 experiences and higher research-related knowledge and attitudes. This role of peers was  
417 particularly underlined in countries grappling with significant training gaps and depletion of  
418 professionals, as reported in the Syrian case (10,11,13,16). The reliance on peers in such settings  
419 is both justified and indispensable, as peer-led training presents a practical and affordable solution  
420 that alleviates the burden on professors and faculty members (39,40). Superiority of peer training  
421 might also be argued, as one study also reported negative experiences (e.g., uncomfortable  
422 interaction) in extracurricular activities delivered by faculty members (30). Notably, the support  
423 from peers extended beyond extracurricular trainings to personalized peer-to-peer assistance  
424 during ongoing research projects (9,16). Our study further underscored that these two forms of  
425 peer-support are of comparable value in the gained knowledge, attitudes, and practice.  
426 Interestingly, both of these methods were significantly more valuable to beneficiaries than the  
427 previously deemed substandard curricular research training (10,11,16), suggesting them as an  
428 established solution for the dearth of expertise in Syria (13).

#### 429 **Limitations:**

430 In spite of the strengths that reside in our sample and methodology, our findings still provide proof  
431 of association rather than causality. For instance, it might be argued that participants with higher  
432 knowledge, attitudes, and more research projects are those who attend workshops training  
433 research skills. However, this remains unlikely for two reasons. First, this explanation does not  
434 justify how high our participants evaluated the best workshops they attended (S. Fig 1). Second,  
435 a significant group of participants had multiple research projects despite declaring that they never  
436 attended any workshop training research skills (Fig 5). On the other hand, one systematic review  
437 suggests that increased knowledge may be driven by medical students' motivation to achieve  
438 higher grades on curriculum-based assessments (41). This explanation does not apply to our  
439 sample, as several reports described how Syrian researchers lack the institutional and curricular  
440 motivation to perform research (10,11,16). Additionally, the academic scores of our participants

441 did not correlate with any measure of attitudes towards research (21). Moreover, the tool we used  
442 remains subjective and lacks the objectivity in assessing research-related knowledge in particular.  
443 It might have also been affected by recall bias as some of the trainings were ten years old by the  
444 time of data collection. Finally, as many participants attended a mixture of workshops of different  
445 characteristics, it was quite difficult to purely assess the impact of each of their characteristics  
446 individually. However, we believe that the clustering methods we used in addition to the self-  
447 evaluation of the best workshops are the best feasible approaches to overcome this obstacle.

#### 448 **Conclusion:**

449 The extracurricular interventions targeting medical research paucity in Syria have proven  
450 successful in helping Syrian early-career medical researchers to find their voice (27). Regardless  
451 of the dreadful circumstances of war, these workshops increased research attitudes, knowledge,  
452 skills, and productivity, and facilitated engagement in the research community. Local peers and  
453 international professionals played crucial roles in this progress; however, these efforts still lack  
454 the institutionally-organized framework that can be achieved by joining forces with medical  
455 faculties.

456

## 457 **DECLARATIONS:**

#### 458 **Acknowledgements:**

459 The authors are grateful to Luma Haj Kassem and Ahmad Naem for their support in data  
460 collection.

#### 461 **declaration of interest:**

462 None of the authors have any conflict of interest that is relevant for this project.

463 **Contributions:**

464 IH conceptualized the project. IH, MA, KK, ARR collected the data. IH, RS, and ARR analyzed  
465 and interpreted the data. IH, MA, KK, and MGN prepared the manuscript. IH supervised the  
466 project. All authors revised and approved the final version of the manuscript.

467 **Ethical approval and consent for publication:**

468 The ethical approval for this study (30/2020) was obtained from the institutional review board of  
469 Damascus University on 19.01.2021. All participants provided their written informed consent for  
470 the publication of their anonymous data before their participation.

471 **Data availability statement:**

472 The data supporting this manuscript is available and can be provided upon reasonable request to  
473 the corresponding author.

474 **Funding:**

475 None of the authors received any funding from any agency that is related to the work on this  
476 project.

477

478 **REFERENCES:**

479 1. Matar HE, Almerie MQ, Adams CE, Essali A. Publications indexed in Medline and Embase  
480 originating from the Syrian Arab Republic: a survey. East Mediterr Health J Rev Sante  
481 Mediterr Orient Al-Majallah Al-Sihhiyah Li-Sharq Al-Mutawassit. 2009;15(3):648–52.

- 482 2. Diab MM, Taftaf RMO, Arabi M. Research productivity in Syria: Quantitative and qualitative  
483 analysis of current status. *Avicenna J Med*. 2011 Jul;1(1):4–7.
- 484 3. Sahloul MZ, Monla-Hassan J, Sankari A, Kherallah M, Atassi B, Badr S, et al. War is the  
485 Enemy of Health. Pulmonary, Critical Care, and Sleep Medicine in War-Torn Syria. *Ann Am*  
486 *Thorac Soc*. 2016 Feb;13(2):147–55.
- 487 4. Coutts A, Fouad FM. Response to Syria’s health crisis—poor and uncoordinated. *Lancet*  
488 *Lond Engl*. 2013 Jun 29;381(9885):2242–3.
- 489 5. Alahdab F, Omar MH, Alsakka S, Al-Moujahed A, Atassi B. Syrians’ alternative to a health  
490 care system: “field hospitals.” *Avicenna J Med*. 2014 Jul;4(3):51–2.
- 491 6. Fouad FM, Sparrow A, Tarakji A, Alameddine M, El-Jardali F, Coutts AP, et al. Health  
492 workers and the weaponisation of health care in Syria: a preliminary inquiry for The Lancet-  
493 American University of Beirut Commission on Syria. *Lancet Lond Engl*. 2017 Dec  
494 2;390(10111):2516–26.
- 495 7. Mohamad O, AlKhoury N, Abdul-Baki MN, Alsalkini M, Shaaban R. Workplace violence  
496 toward resident doctors in public hospitals of Syria: prevalence, psychological impact, and  
497 prevention strategies: a cross-sectional study. *Hum Resour Health*. 2021 Jan 7;19(1):8.
- 498 8. Alhaffar BA, Abbas G, Alhaffar AA. The prevalence of burnout syndrome among resident  
499 physicians in Syria. *J Occup Med Toxicol Lond Engl*. 2019;14:31.
- 500 9. Al Saadi T, Abbas F, Turk T, Alkhatib M, Hanafi I, Alahdab F. Medical research in war-torn  
501 Syria: medical students’ perspective. *Lancet Lond Engl*. 2018 Jun 23;391(10139):2497–8.
- 502 10. Turk T, Al Saadi T, Alkhatib M, Hanafi I, Alahdab F, Firwana B, et al. Attitudes, barriers, and  
503 practices toward research and publication among medical students at the University of  
504 Damascus, Syria. *Avicenna J Med*. 2018;8(1):24–33.
- 505 11. Alahdab F, Firwana B, Hasan R, Sonbol MB, Fares M, Alnahhas I, et al. Undergraduate  
506 medical students’ perceptions, attitudes, and competencies in evidence-based medicine  
507 (EBM), and their understanding of EBM reality in Syria. *BMC Res Notes*. 2012 Aug  
508 12;5:431.
- 509 12. Busse CE, Anderson EW, Endale T, Smith YR, Kaniecki M, Shannon C, et al. Strengthening  
510 research capacity: a systematic review of manuscript writing and publishing interventions for  
511 researchers in low-income and middle-income countries. *BMJ Glob Health*. 2022  
512 Feb;7(2):e008059.
- 513 13. Hanafi I, Kheder K, Sabouni R, Gorra Al Nafouri M, Hanafi B, Alsalkini M, et al.  
514 Synchronicity and peer-reviewed assignments in online scientific writing training with limited  
515 resources: a four-arm blinded randomized controlled trial with one-year follow-up [Internet].  
516 2022 [cited 2023 Jun 3]. Available from: <https://www.researchsquare.com>
- 517 14. Sabouni A, Bdaiwi Y, Janoudi SL, Namous LO, Turk T, Alkhatib M, et al. Multiple strategy  
518 peer-taught evidence-based medicine course in a poor resource setting. *BMC Med Educ*.  
519 2017 May 4;17(1):82.

- 520 15. Alahdab F, Alabed S, Al-Moujahed A, Al Sallakh MA, Alyousef T, Alsharif U, et al. Evidence-  
521 based medicine: a persisting desire under fire. *Evid Based Med*. 2017 Mar;22(1):9–11.
- 522 16. Hanafi I, Haj Kassem L, Hanafi M, Ahmad S, Abbas O, Hajeer MY, et al. Medical Research  
523 Conduct and Publication during Higher Education in Syria: Attitudes, Barriers, Practices,  
524 and Possible Solutions. *Avicenna J Med*. 2022 Jul;12(3):127–37.
- 525 17. Bdaiwi Y, Rayes D, Sabouni A, Murad L, Fouad F, Zakaria W, et al. Challenges of providing  
526 healthcare worker education and training in protracted conflict: a focus on non-government  
527 controlled areas in north west Syria. *Confl Health*. 2020;14:42.
- 528 18. Camargo CP, Tempski PZ, Busnardo FF, Martins M de A, Gemperli R. Online learning and  
529 COVID-19: a meta-synthesis analysis. *Clin Sao Paulo Braz*. 2020;75:e2286.
- 530 19. Qazi A, Naseer K, Qazi J, AlSalman H, Naseem U, Yang S, et al. Conventional to online  
531 education during COVID-19 pandemic: Do develop and underdeveloped nations cope alike.  
532 *Child Youth Serv Rev*. 2020 Dec;119:105582.
- 533 20. NIH Clinical Center News: April 2017 [Internet]. [cited 2023 Jun 3]. Available from:  
534 <https://clinicalcenter.nih.gov/about/news/newsletter/2017/apr2017/story-april-06-syria.html>
- 535 21. Hanafi I, Kheder K, Sabouni R, Rahmeh A, Alsalkini M, Hanafi M, et al. Factors Influencing  
536 Research Productivity among Syrian Medical Professionals amidst Conflict: a Case-Control  
537 Study. 2024.
- 538 22. Larsen CM, Terkelsen AS, Carlsen AMF, Kristensen HK. Methods for teaching evidence-  
539 based practice: a scoping review. *BMC Med Educ*. 2019 Jul 11;19(1):259.
- 540 23. Aslam F, Shakir M, Qayyum MA. Why Medical Students Are Crucial to the Future of  
541 Research in South Asia. *PLOS Med*. 2005 Nov 29;2(11):e322.
- 542 24. Negida AS, Negida A. Egypt's Premier Medical Student Research Group: A New Model for  
543 Medical Student Research in Developing Countries. *Cureus* [Internet]. 2018 Nov 8 [cited  
544 2023 Jun 3];10(11). Available from: [https://www.cureus.com/articles/10927-egypts-premier-  
545 medical-student-research-group-a-new-model-for-medical-student-research-in-developing-  
546 countries](https://www.cureus.com/articles/10927-egypts-premier-medical-student-research-group-a-new-model-for-medical-student-research-in-developing-countries)
- 547 25. El Achi N, Papamichail A, Rizk A, Lindsay H, Menassa M, Abdul-Khalek RA, et al. A  
548 conceptual framework for capacity strengthening of health research in conflict: the case of  
549 the Middle East and North Africa region. *Glob Health*. 2019 Nov 28;15(1):81.
- 550 26. Kenjrawi Y, Dashash M. The First Asynchronous Online Evidence-Based Medicine Course  
551 for Syrian Health Workforce: Effectiveness and Feasibility Pilot Study. *JMIR Form Res*  
552 [Internet]. 2022 Oct [cited 2023 Jun 3];6(10). Available from:  
553 <https://www.ncbi.nlm.nih.gov/pmc/articles/PMC9644249/>
- 554 27. Sabouni A, Chaar A, Bdaiwi Y, Masrani A, Abolaban H, Alahdab F, et al. An online  
555 academic writing and publishing skills course: Help Syrians find their voice. *Avicenna J Med*.  
556 2017 Jul;07(03):103–9.



- 557 28. Alabdullah MN, Alabdullah H, Kamel S. Knowledge, attitude, and practice of evidence-  
558 based medicine among resident physicians in hospitals of Syria: a cross-sectional study.  
559 BMC Med Educ. 2022 Nov 14;22(1):785.
- 560 29. Assar A, Matar SG, Hasabo EA, Elsayed SM, Zaazouee MS, Hamdallah A, et al.  
561 Knowledge, attitudes, practices and perceived barriers towards research in undergraduate  
562 medical students of six Arab countries. BMC Med Educ. 2022 Jan 18;22(1):44.
- 563 30. Chun KH, Park WK, Lee SS, Park YS, Kang E. A study on the educational climate, self-  
564 directed learning and creative thinking in medical school. Korean J Think Dev.  
565 2010;6(1):179–200.
- 566 31. Lee HJ, Kang YJ, Lee SH, Lin Y, Kim DH, Ihm J. Relationship matters: a qualitative study of  
567 medical students' experiences in a learner-driven research program in South Korea. BMC  
568 Med Educ. 2023 May 16;23(1):337.
- 569 32. Archer A, Berry I, Bajwa U, Kalda R, Di Ruggiero E. Preferred modalities for delivering  
570 continuing education to the public health workforce: a scoping review. Health Promot  
571 Chronic Dis Prev Can Res Policy Pract. 2020 Apr;40(4):116–25.
- 572 33. Mugabo L, Rouleau D, Odhiambo J, Nisingizwe MP, Amoroso C, Barebwanuwe P, et al.  
573 Approaches and impact of non-academic research capacity strengthening training models in  
574 sub-Saharan Africa: a systematic review. Health Res Policy Syst. 2015 Jun 9;13(1):30.
- 575 34. Zhao F, Fu Y, Zhang QJ, Zhou Y, Ge PF, Huang HX, et al. The comparison of teaching  
576 efficiency between massive open online courses and traditional courses in medicine  
577 education: a systematic review and meta-analysis. Ann Transl Med. 2018 Dec;6(23):458–  
578 458.
- 579 35. Launois P, Maher D, Certain E, Ross B, Penkunas MJ. Implementation research training for  
580 learners in low- and middle-income countries: evaluating behaviour change after  
581 participating in a massive open online course. Health Res Policy Syst. 2021 Apr 6;19(1):59.
- 582 36. Li T, Yang N. Comparing MOOCs with Traditional Courses for Quality Teaching in Higher  
583 Education. DEStech Trans Soc Sci Educ Hum Sci. 2019 Jan 24;
- 584 37. Kop R, Fournier H, Mak JSF. A pedagogy of abundance or a pedagogy to support human  
585 beings? Participant support on massive open online courses. Int Rev Res Open Distrib  
586 Learn. 2011;12(7):74–93.
- 587 38. McMichael C, Waters E, Volmink J. Evidence-based public health: what does it offer  
588 developing countries? J Public Health. 2005 Jun 1;27(2):215–21.
- 589 39. Fleming-Nouri A, Crocombe D, Sammaraiee Y. Twelve tips on setting up and running a  
590 peer-led medical education society. Med Teach. 2016 Dec 1;38(12):1199–203.
- 591 40. Allikmets S, Vink JP. The benefits of peer-led teaching in medical education. Adv Med Educ  
592 Pract. 2016 May 31;7:329–30.



593 41. Ahmadi SF, Baradaran HR, Ahmadi E. Effectiveness of teaching evidence-based medicine  
594 to undergraduate medical students: a BEME systematic review. Med Teach. 2015  
595 Jan;37(1):21–30.

596

## 597 **PRACTICE POINTS:**

598 Syrian extracurricular training initiatives positively impact knowledge, attitudes, and research  
599 productivity among early career healthcare professionals.

600 Expanding extracurricular initiatives could offer a maintainable method to significantly enhance  
601 research capacity in resource-constrained settings.

602 Massive open online courses and longer-duration trainings are more effective in achieving these  
603 outcomes.

604 Policymakers and educators may incorporate these initiatives to optimize research outcomes  
605 despite limited resources.

606

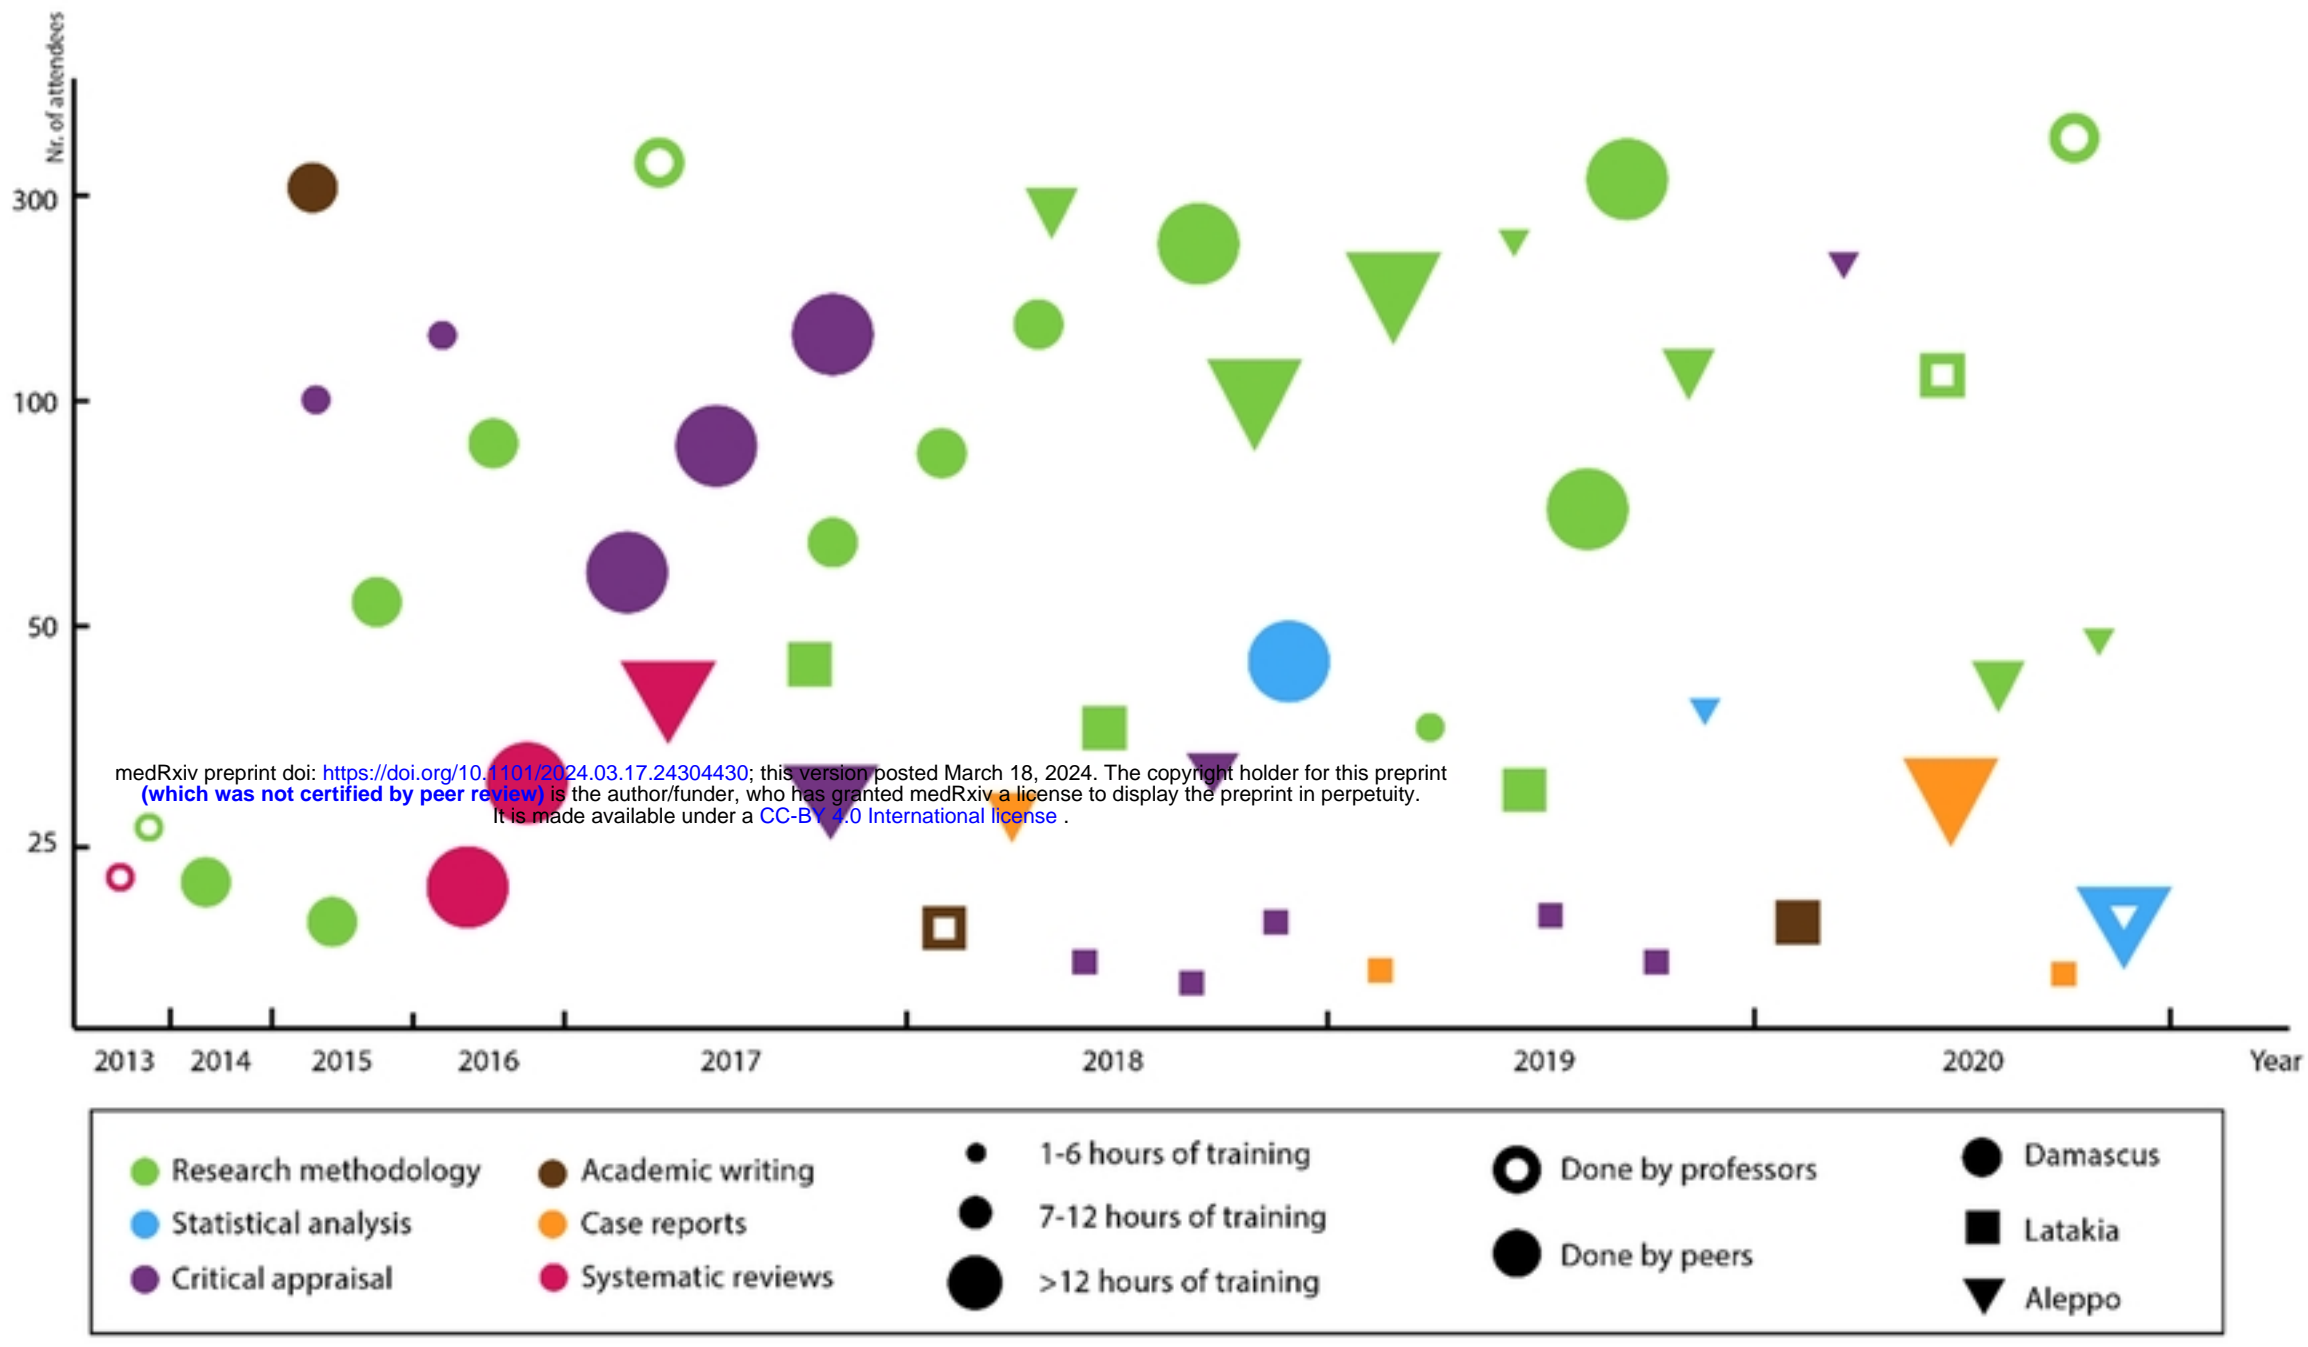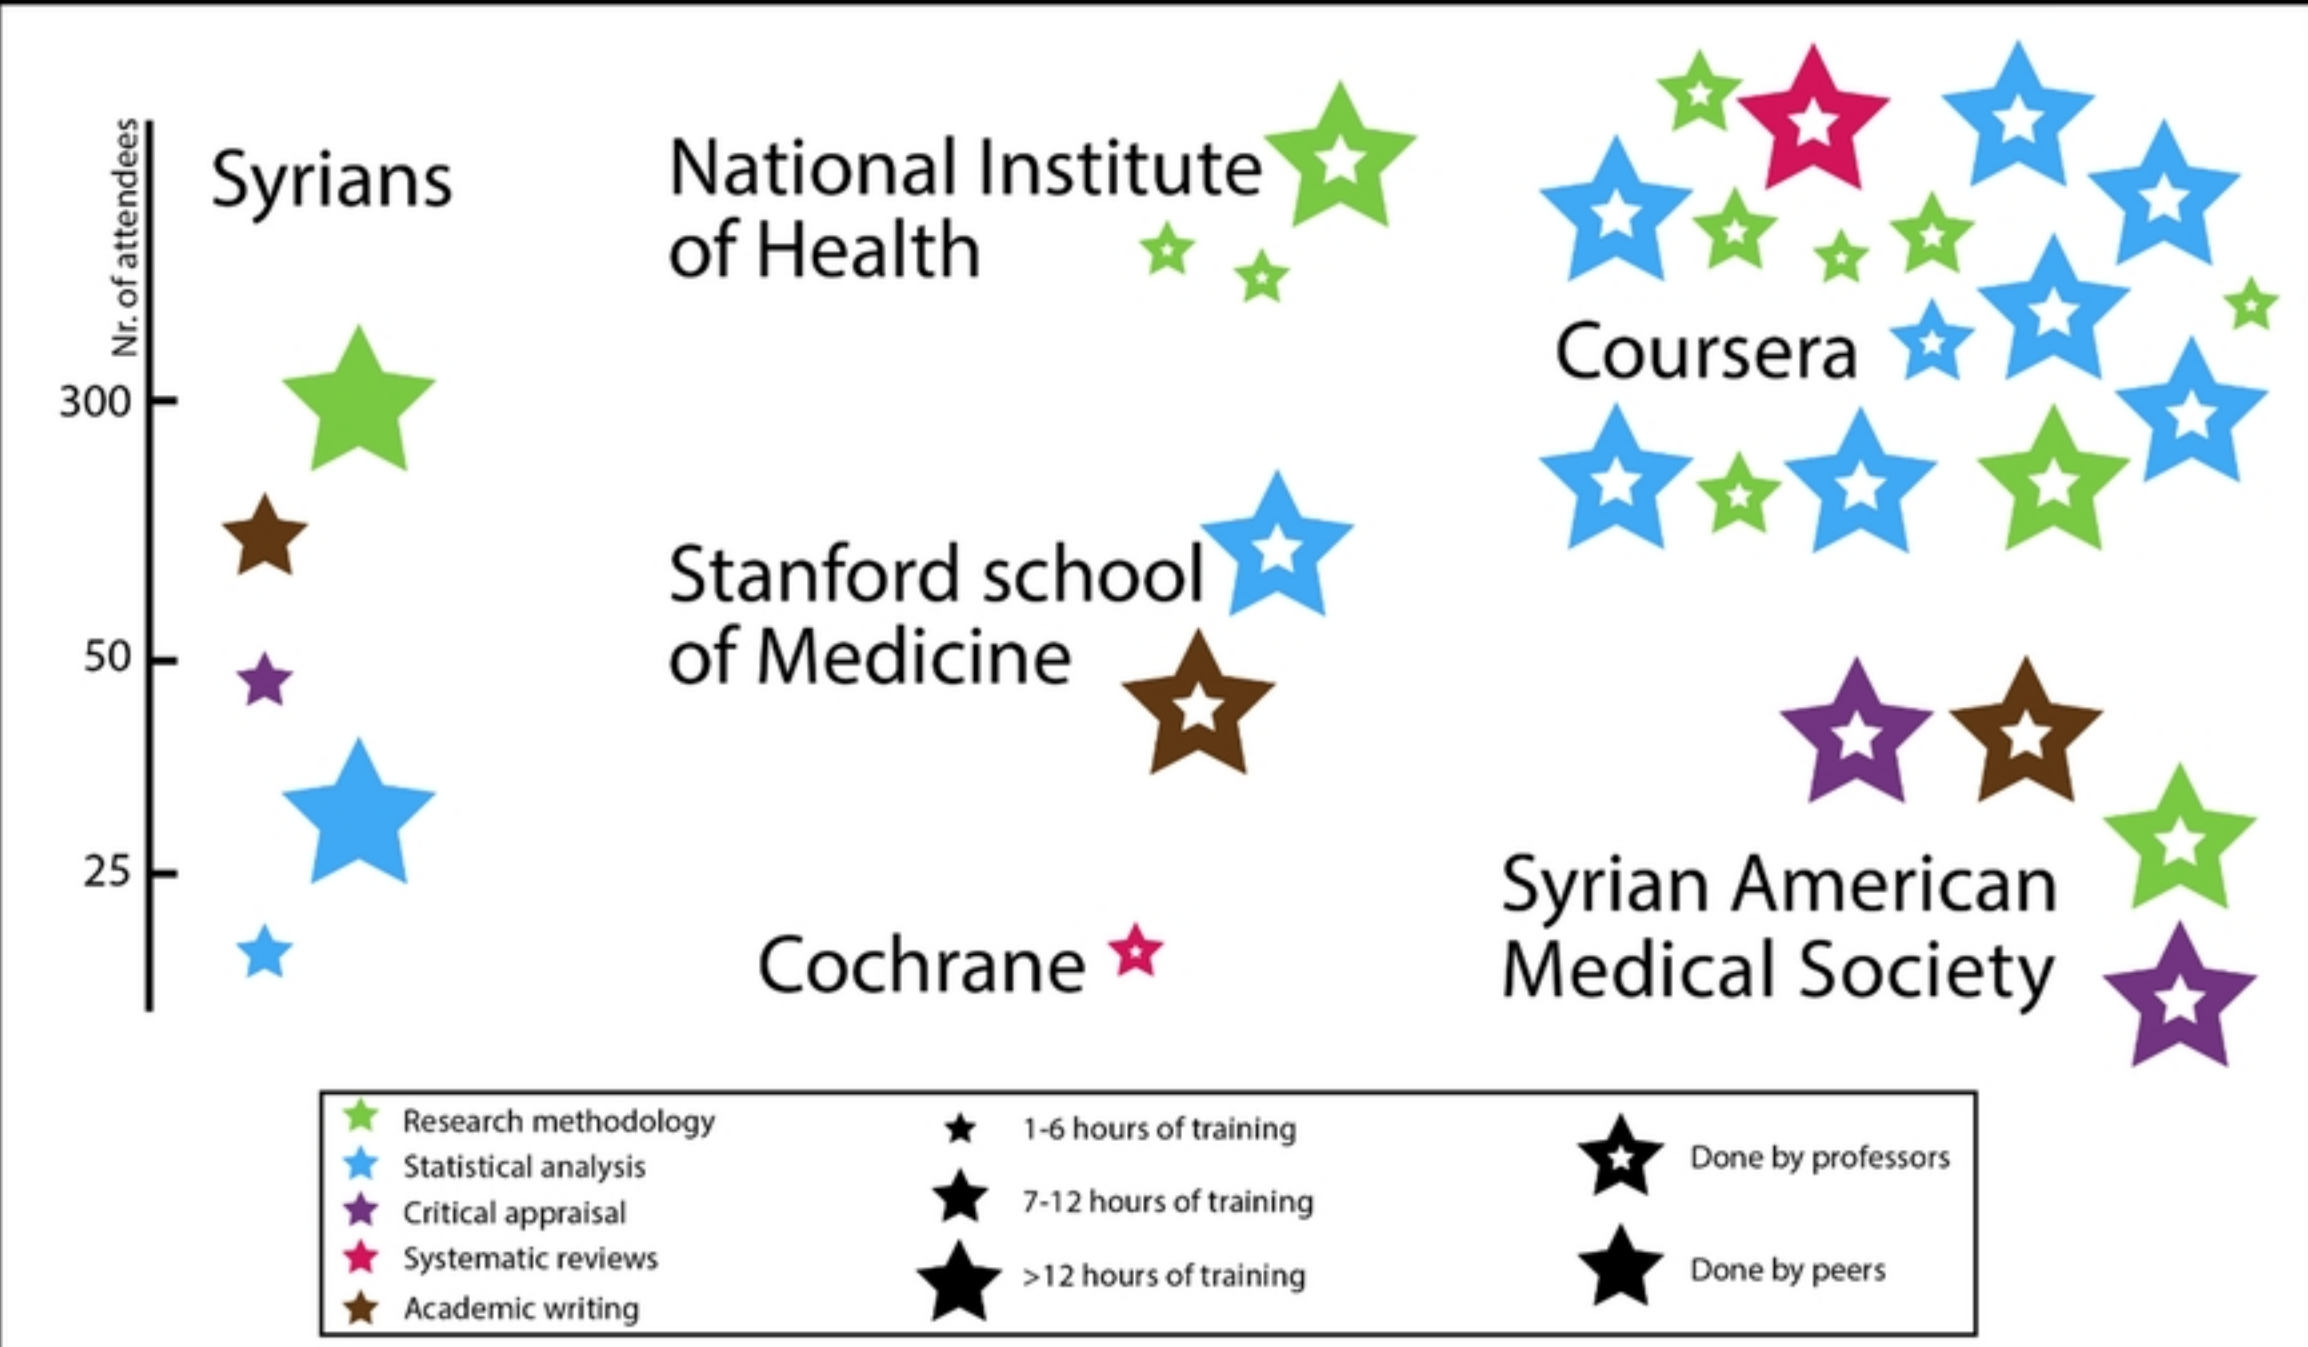

Fig 1

Scatter Plot of participation and publication by workshops

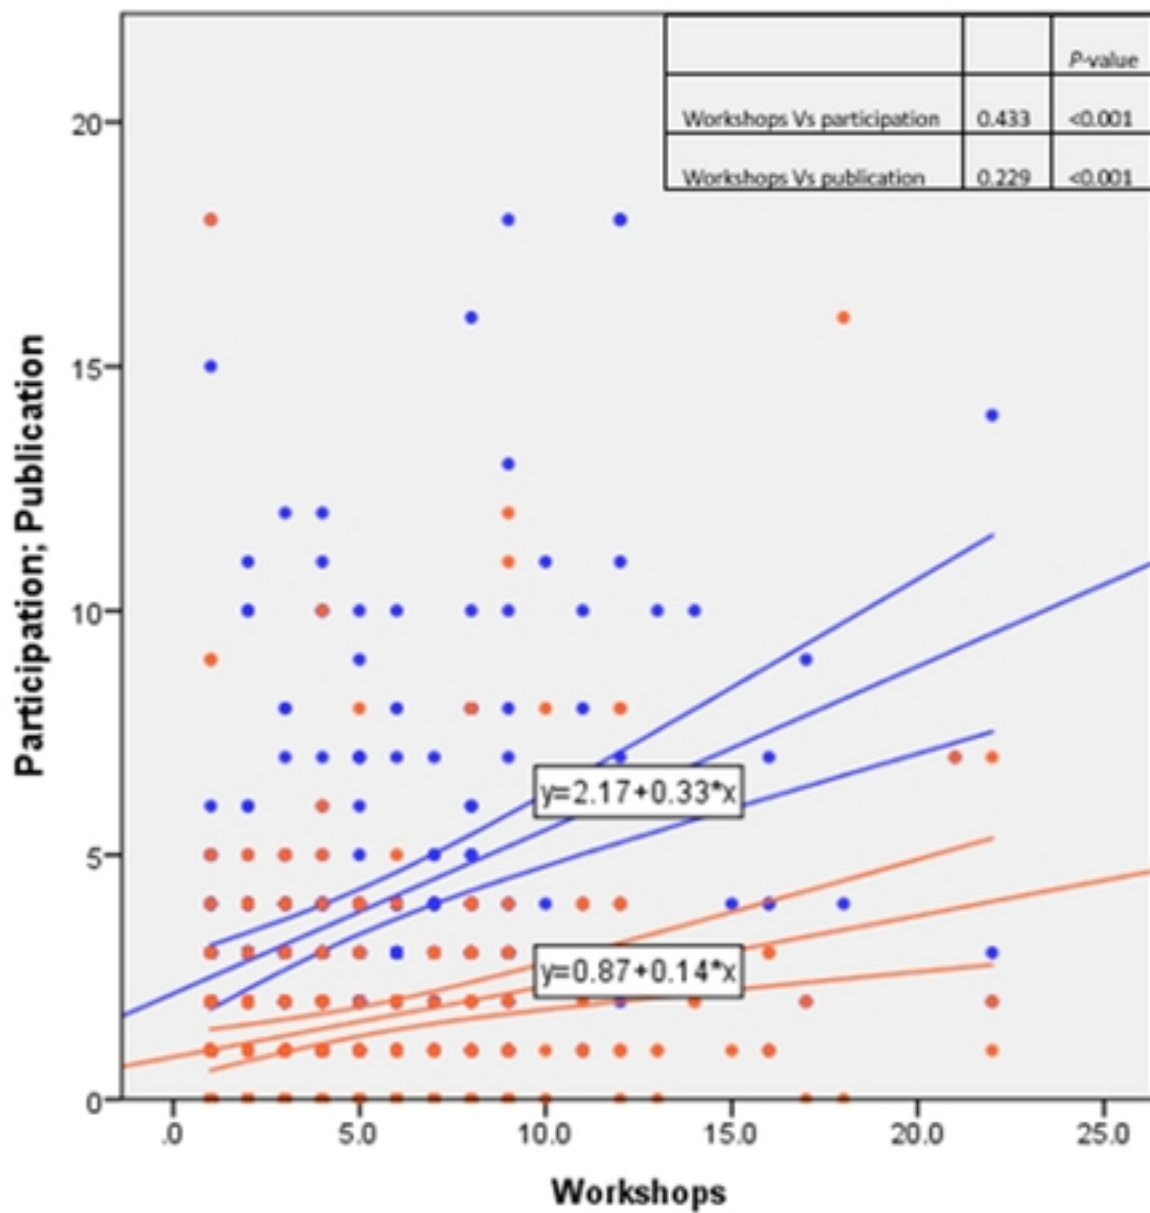

Scatter Plot of knowledge and attitudes by workshops

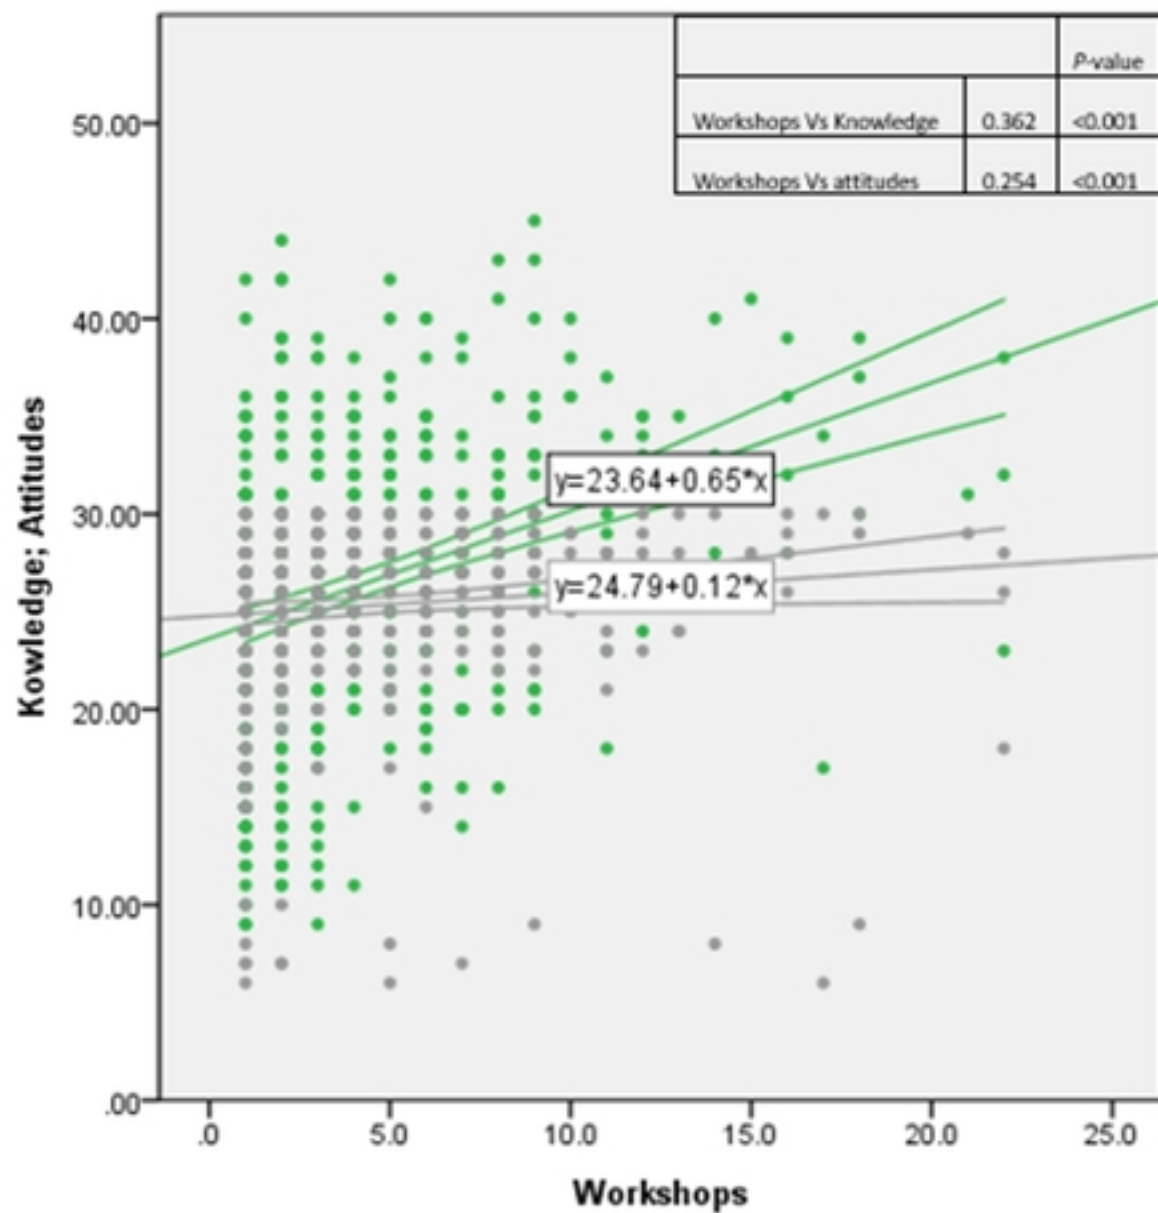

Fig 2

### a) City and trainers

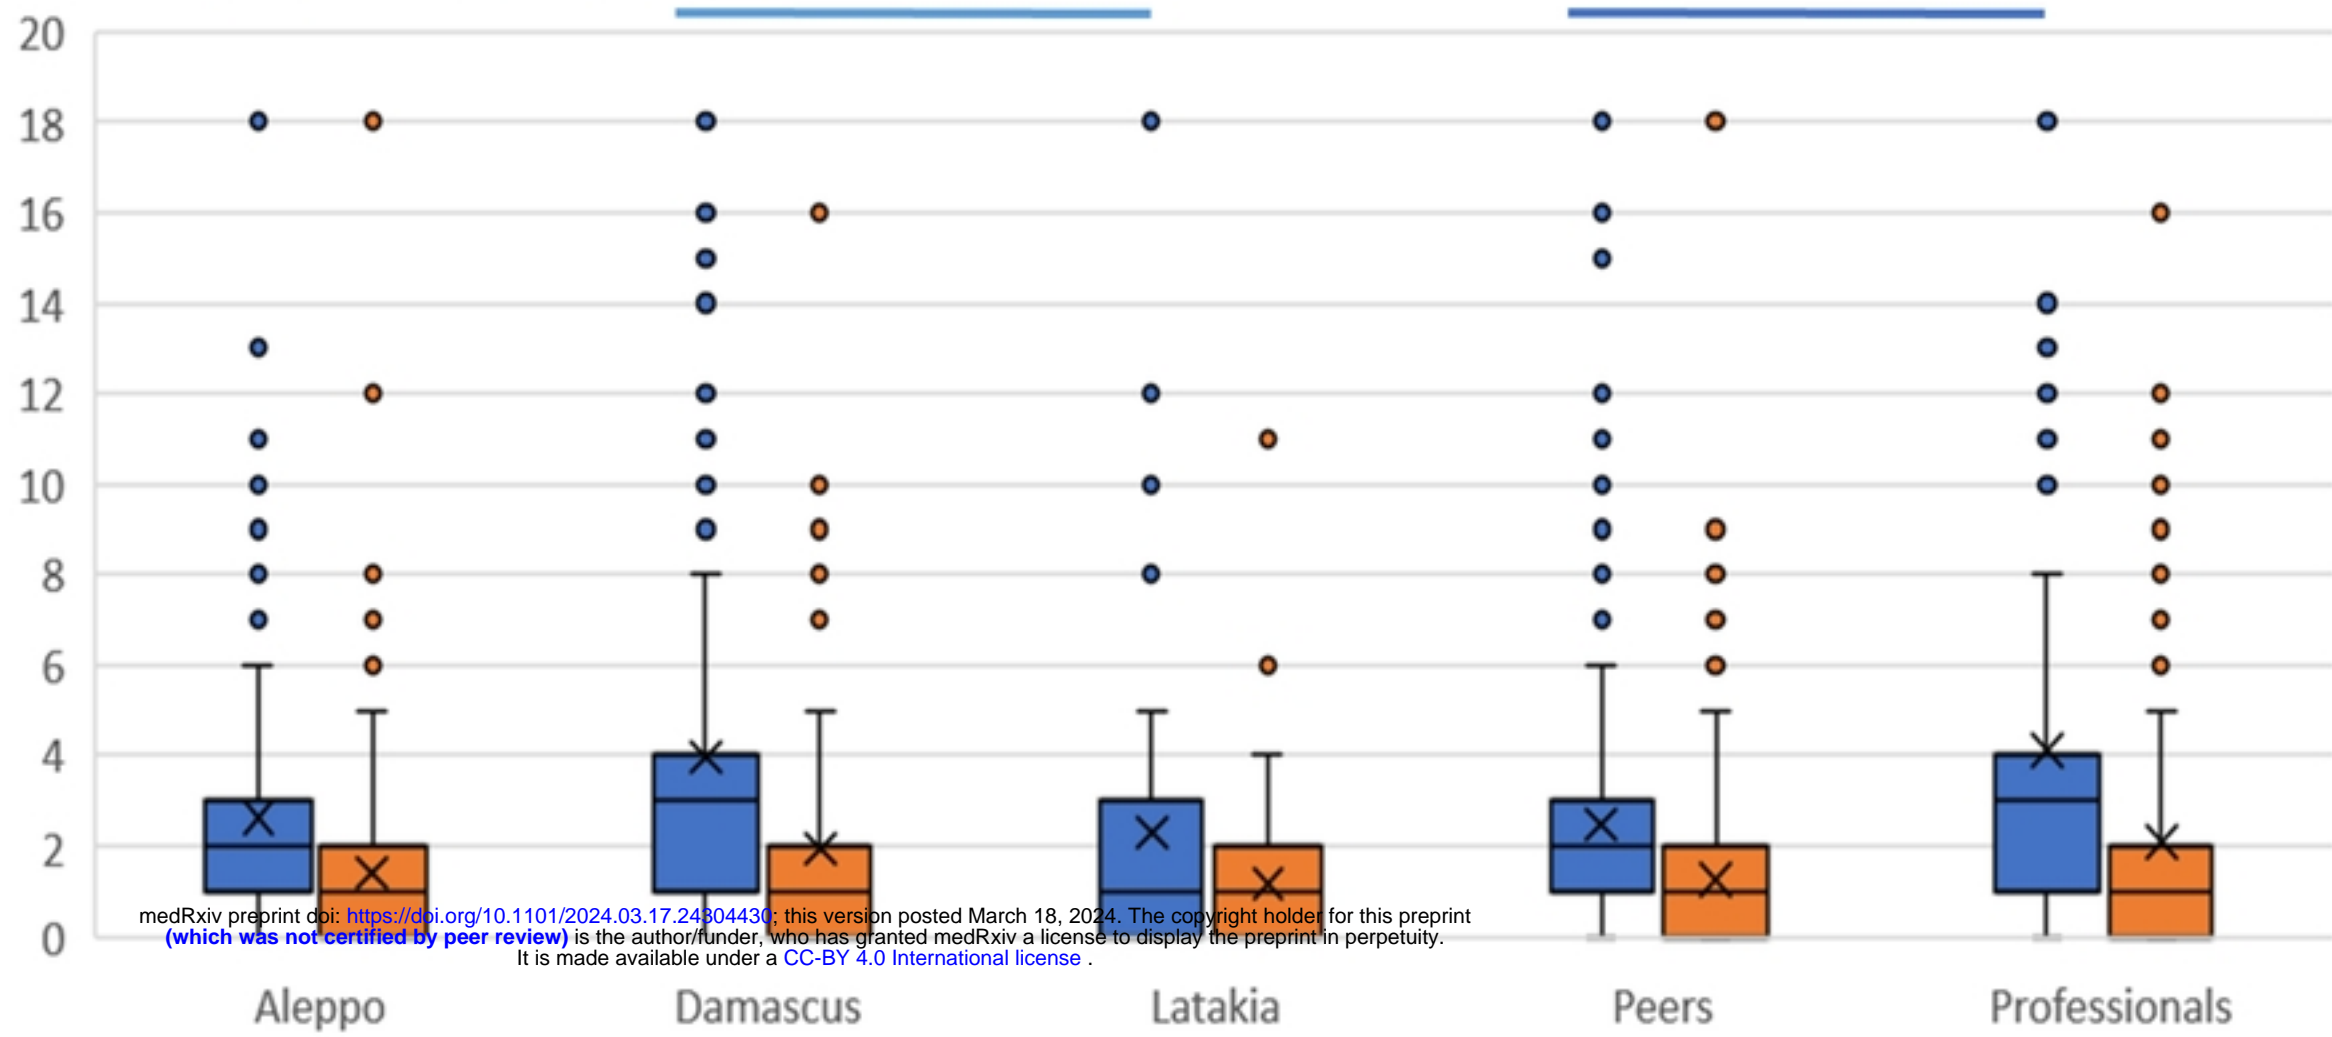

### b) workshops year, length, and size

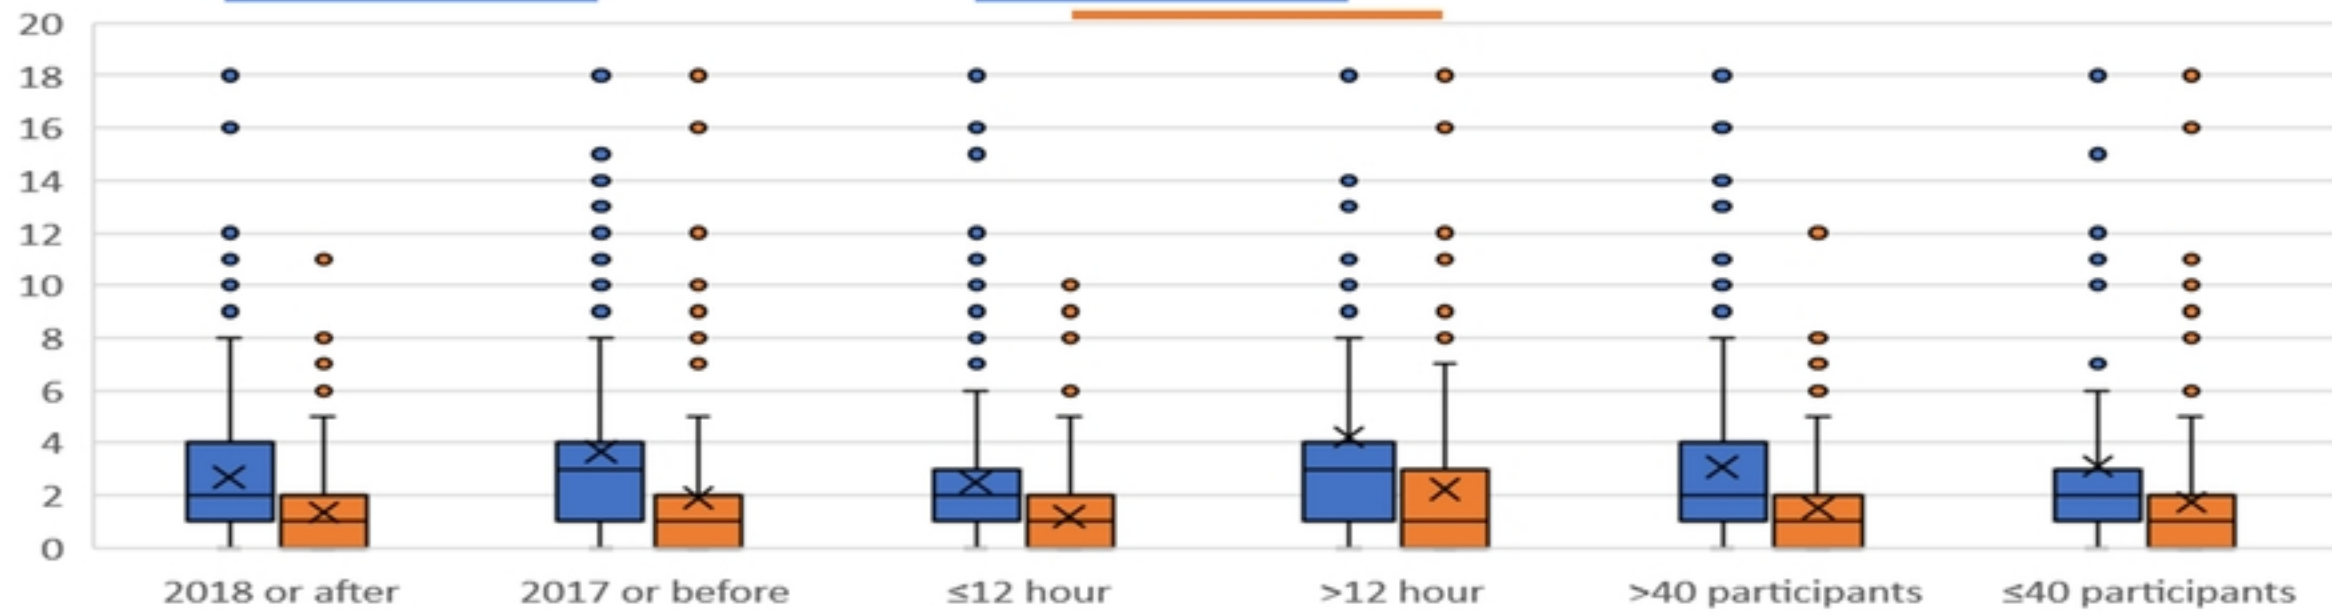

### c) Workshops attendance type, audience of online workshops, and workshops focus

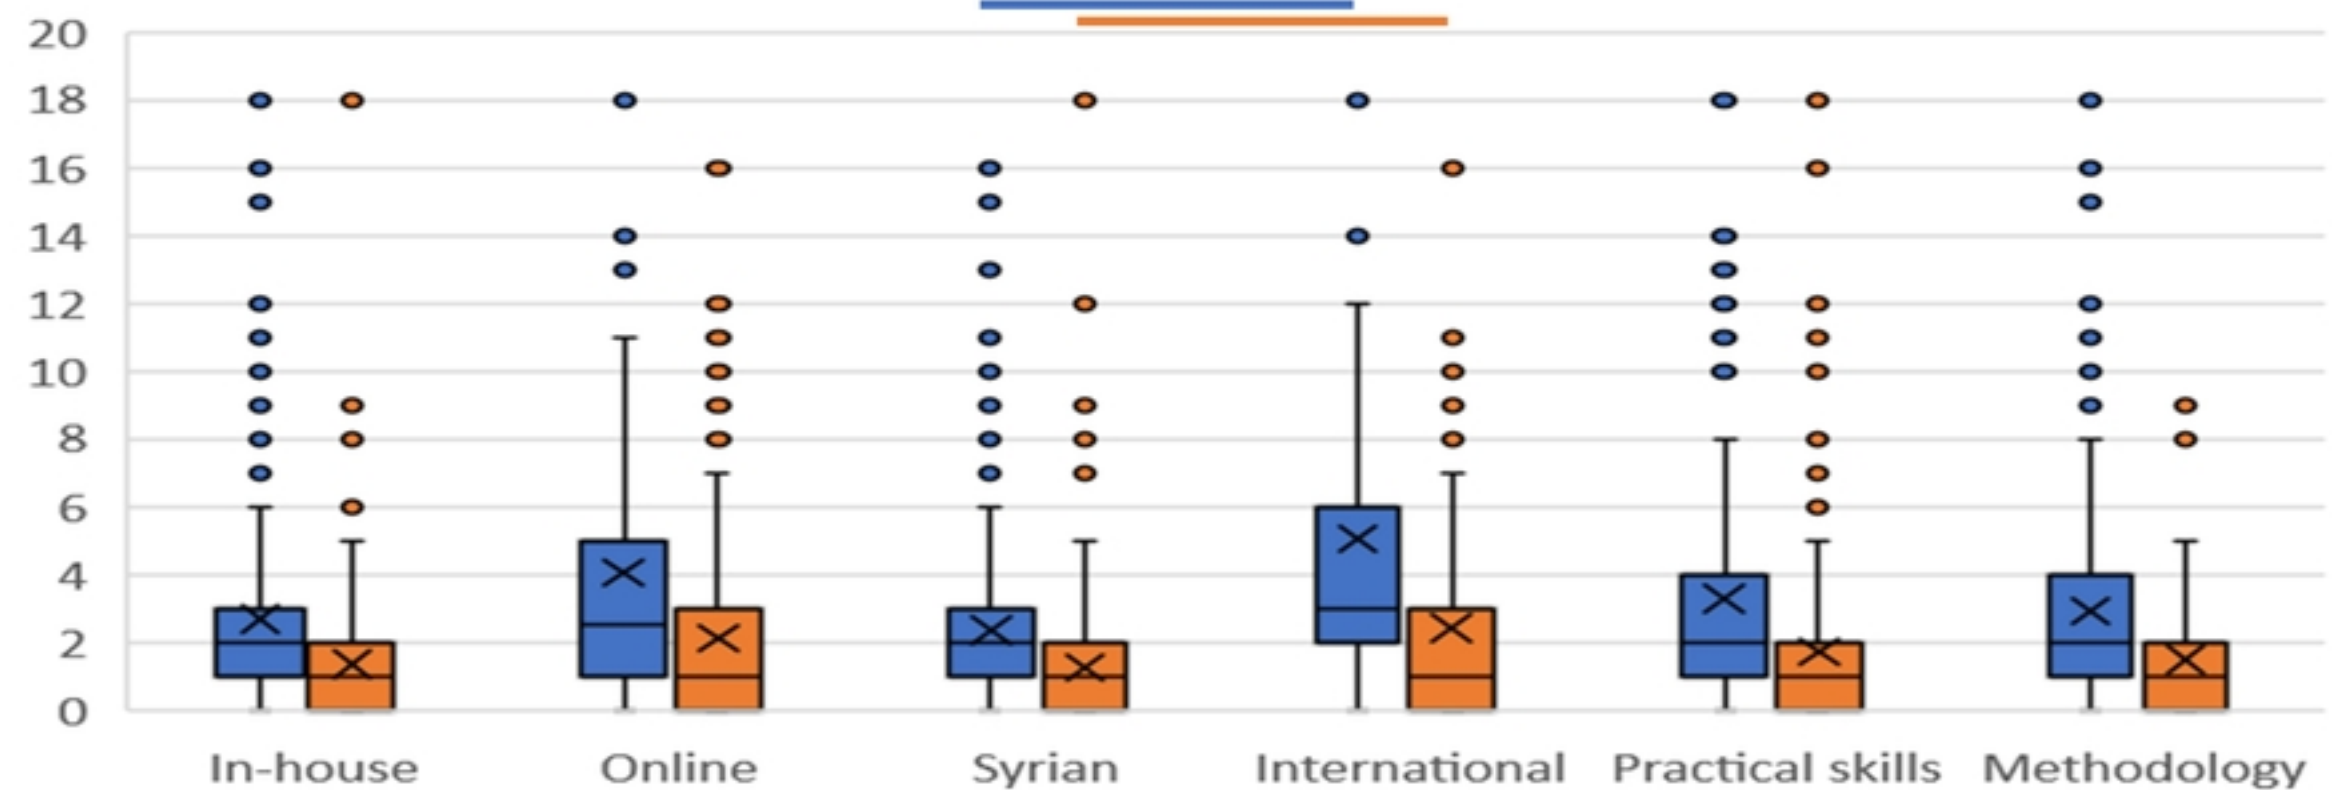

■ Research conductors ■ Publications

Fig 3



### a) City and trainers

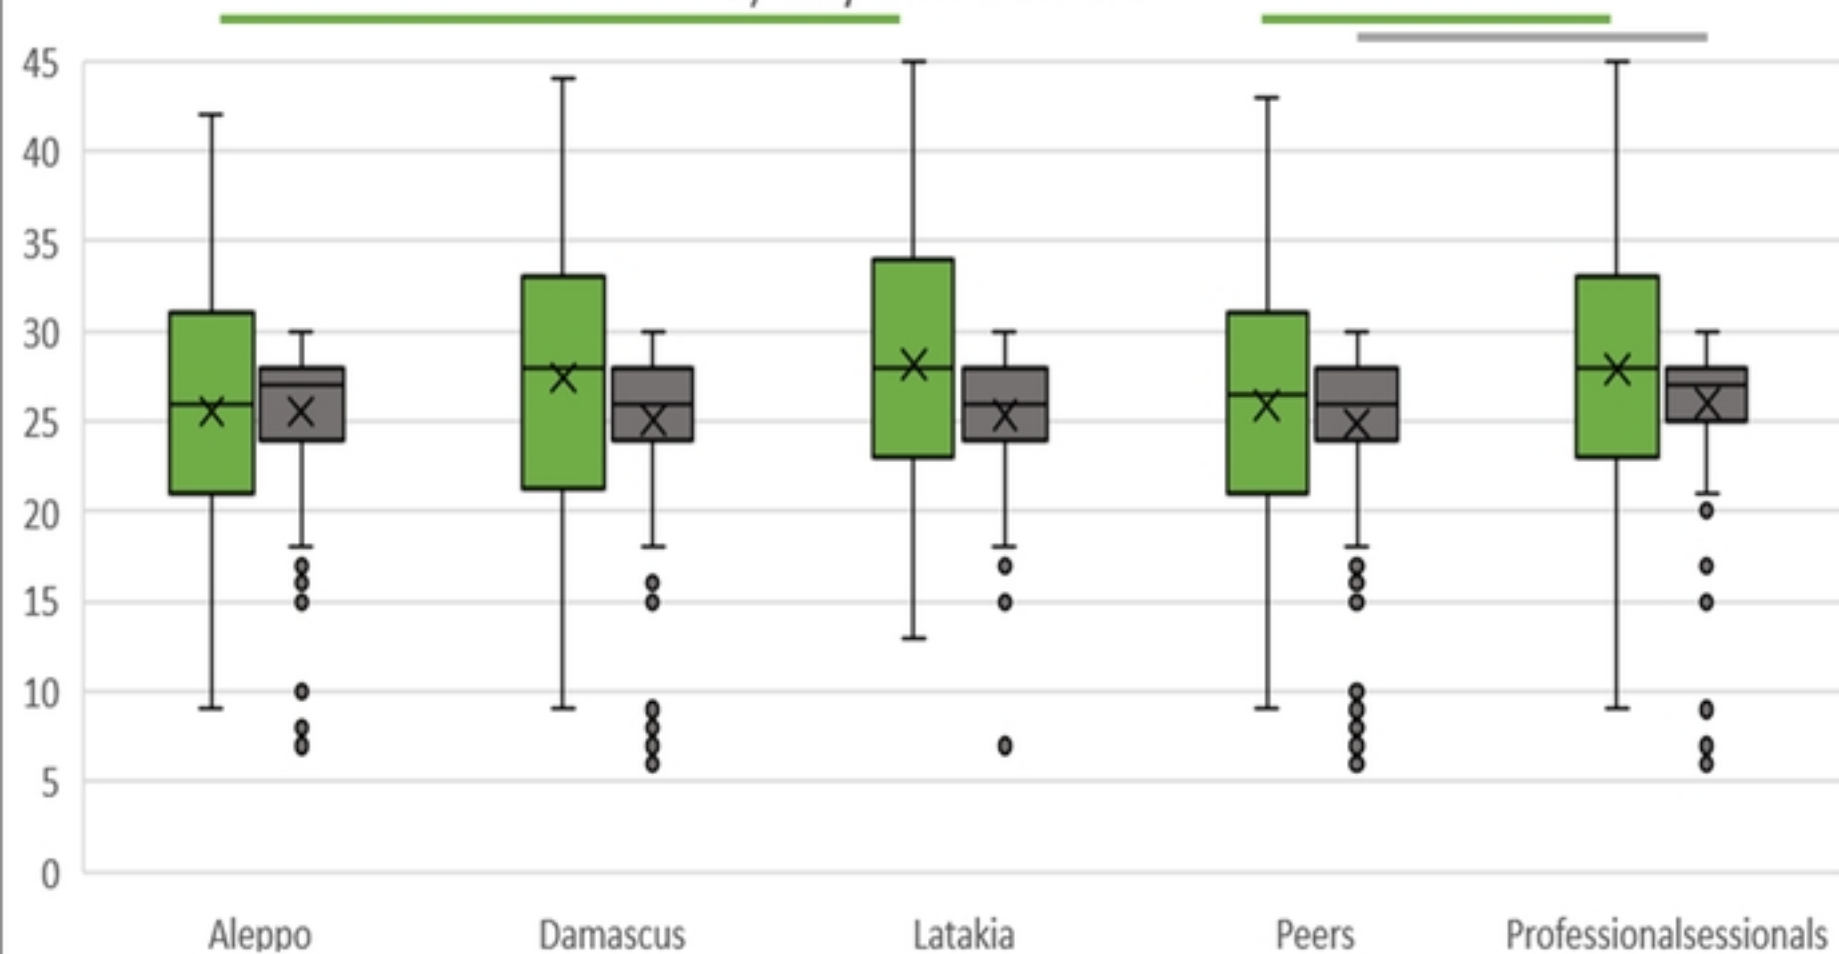

### b) workshops year, length, and size

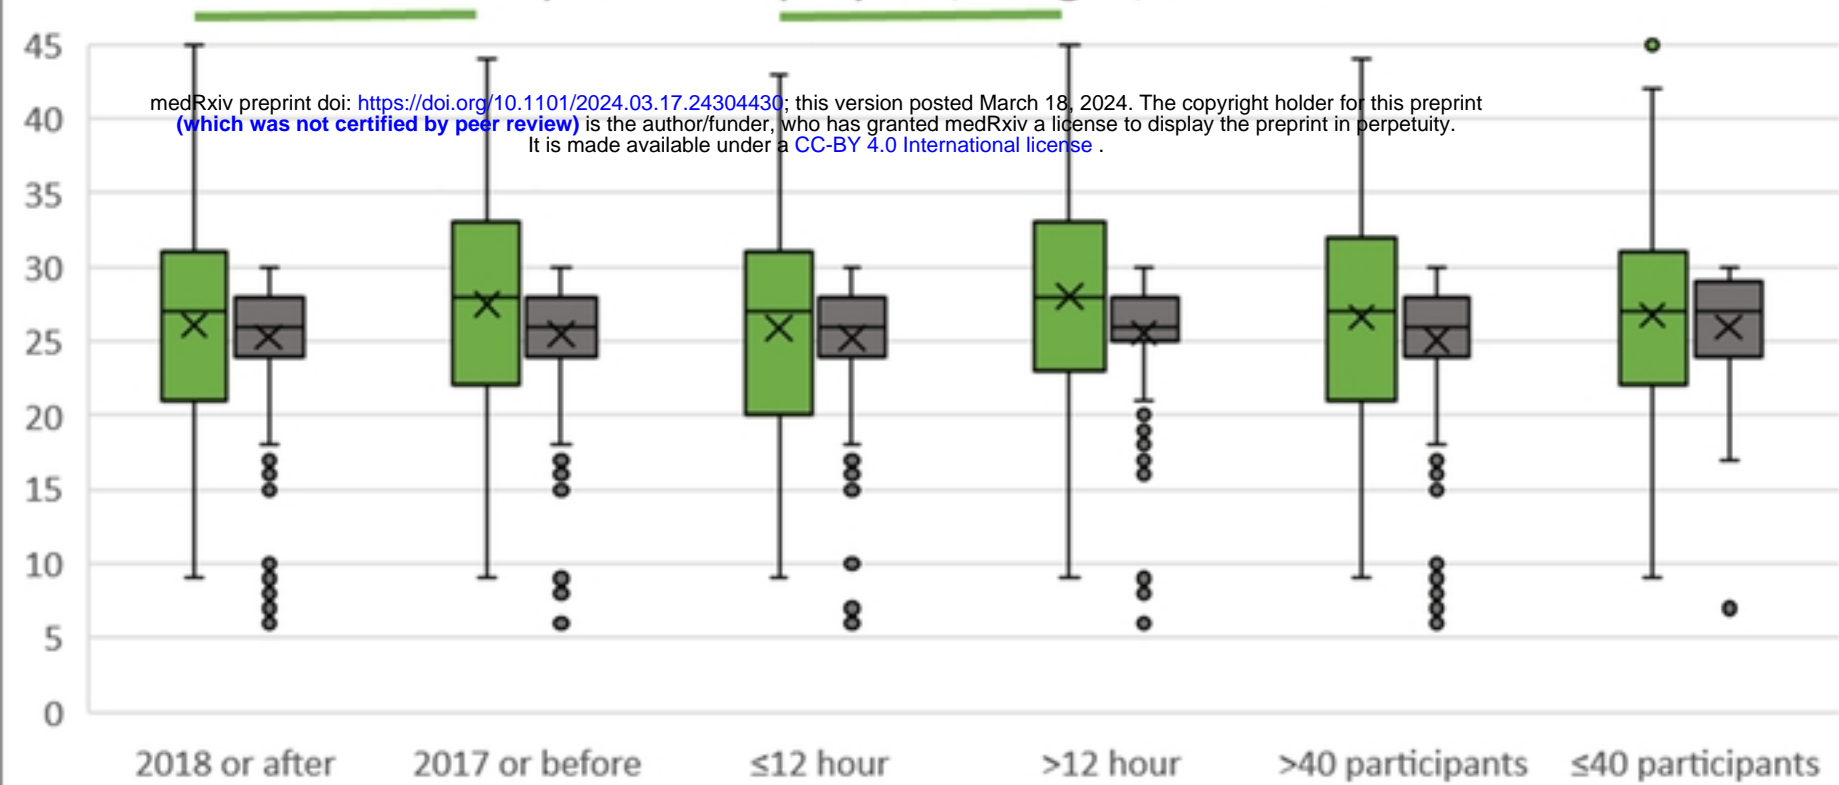

### c) Workshops attendance type, audience of online workshops, and workshops focus

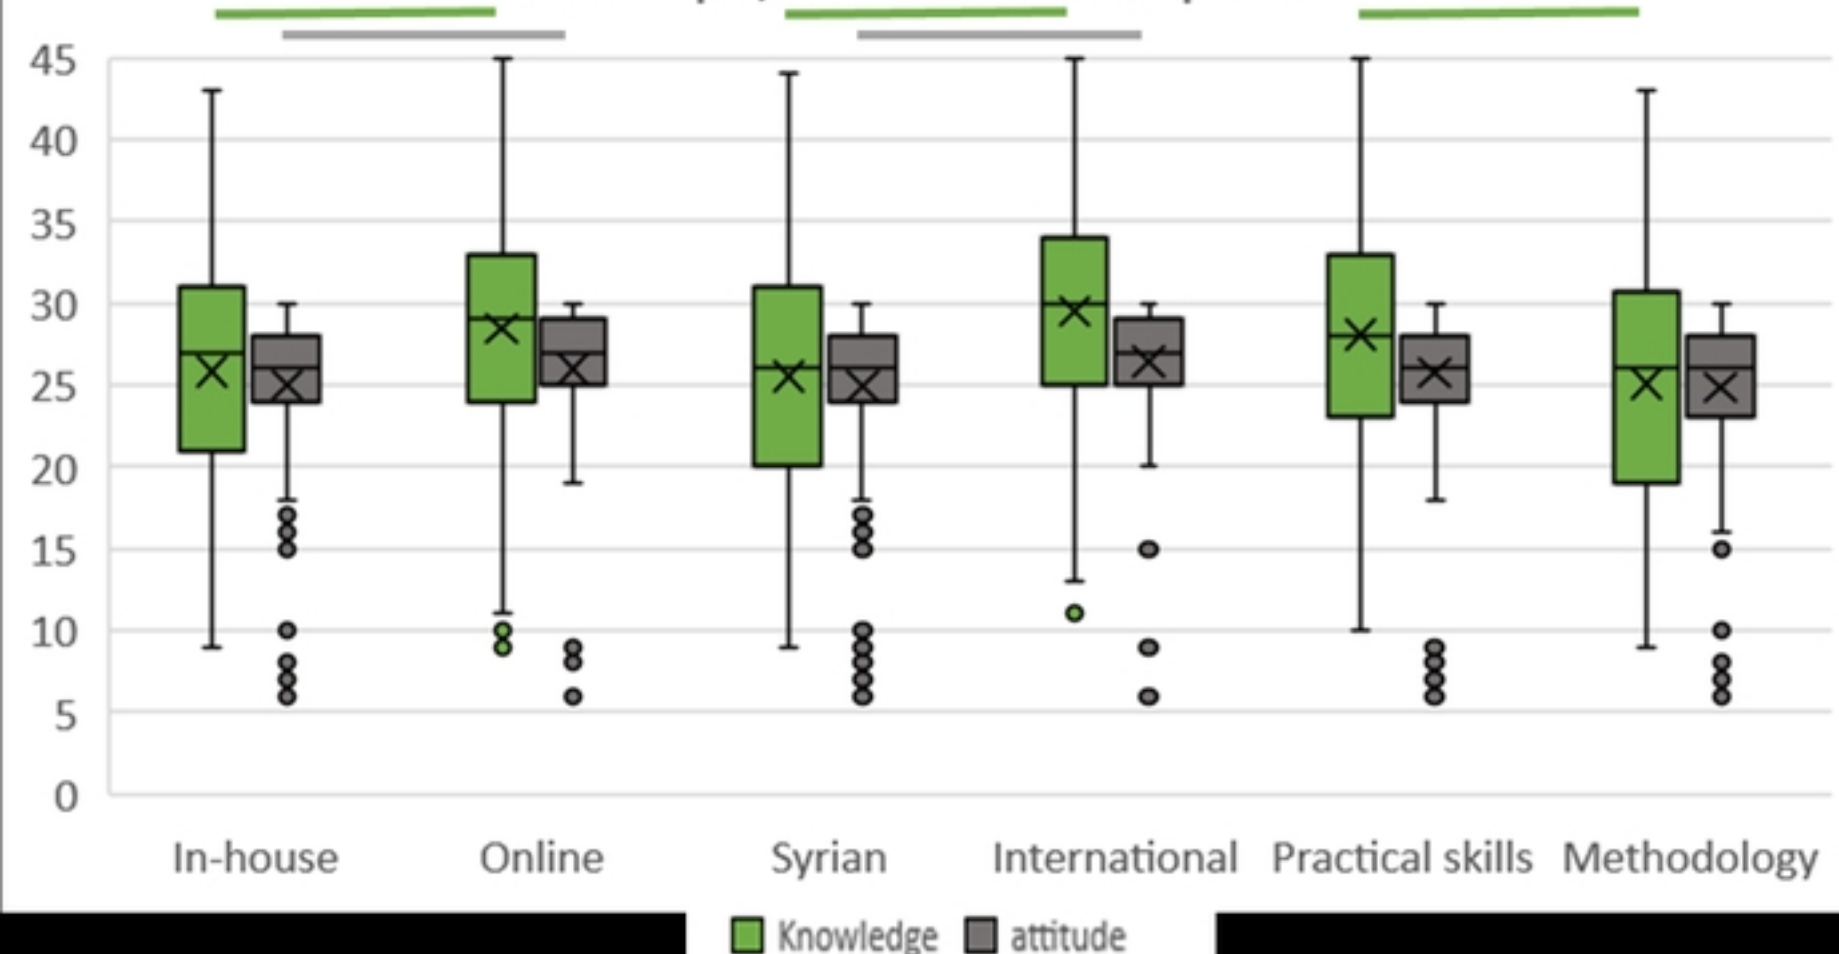

Fig 4

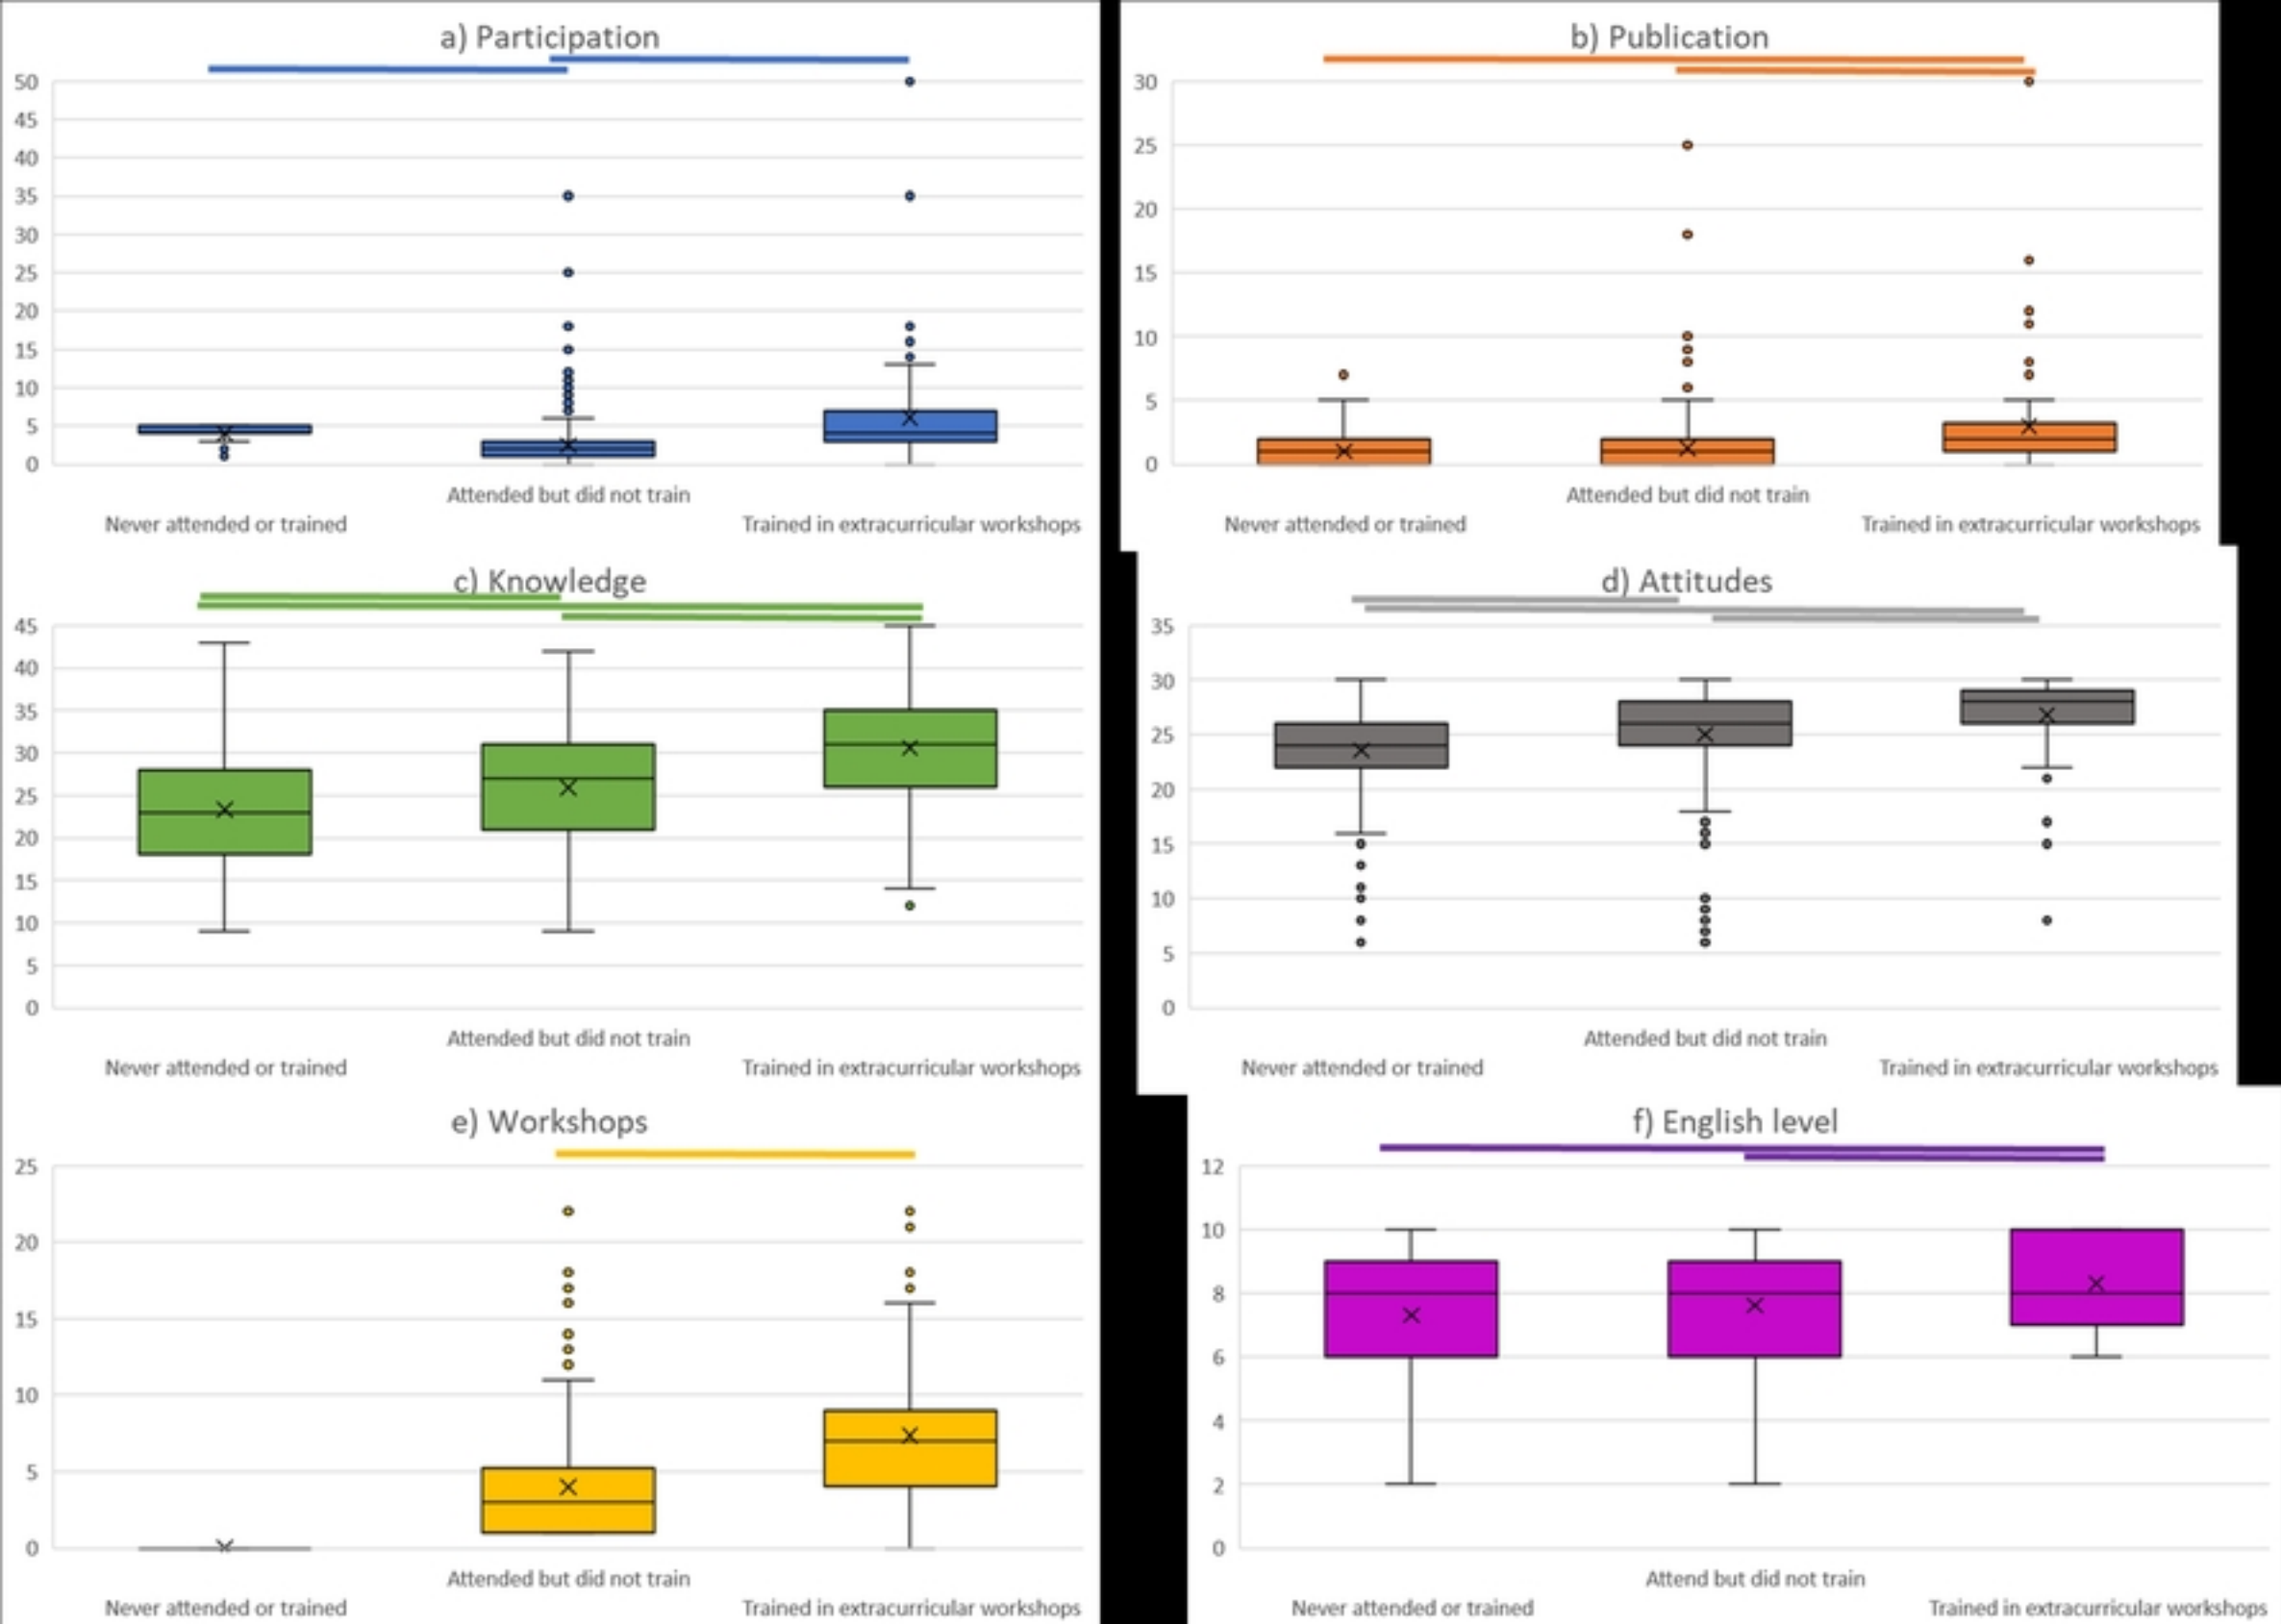

Fig 5

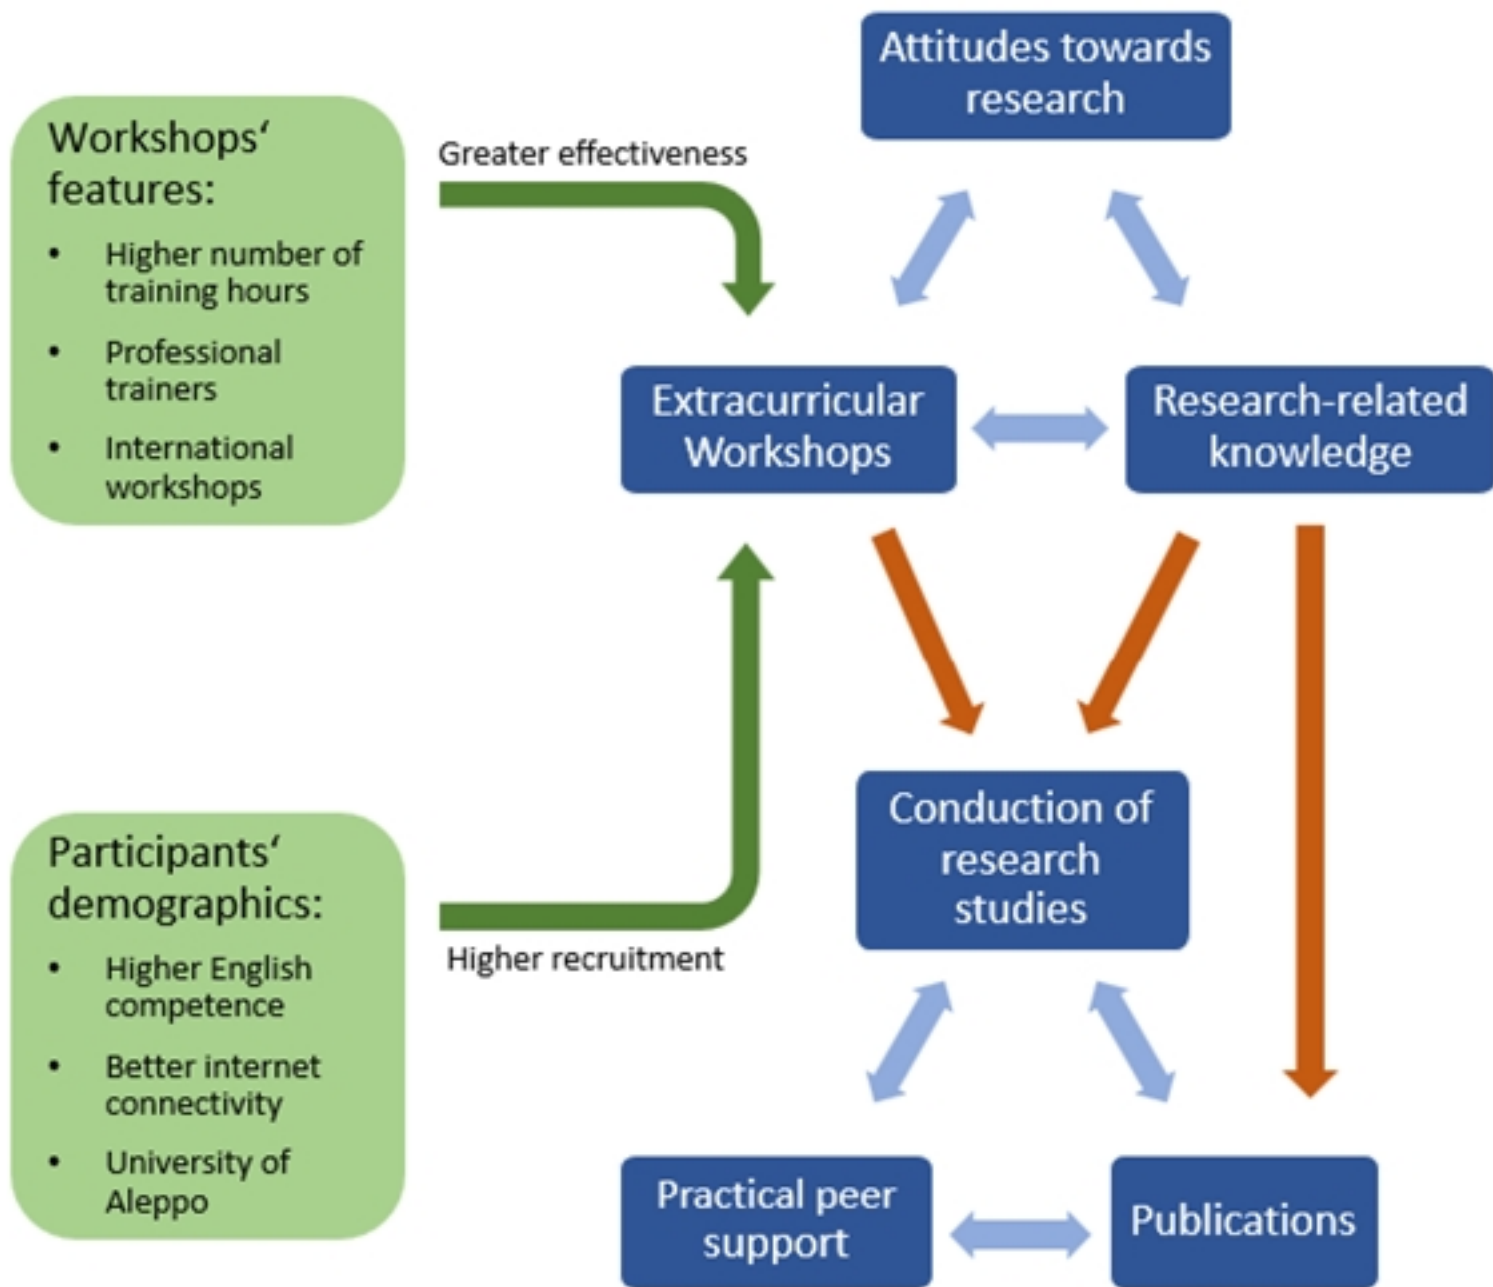

Fig 6
